# Supplementary material for: Regiospecific Hydrogenation of Bromochalcone by Unconventional Yeast Strains
Source: MDPI journal article supplement (doi:10.3390/molecules27123681), 2022-06-08

## Regiospecific hydrogenation of bromochalcone by unconventional yeast strains

Mateusz Łużny<sup>1</sup>, Dagmara Kaczanowska<sup>1</sup>, Barbara Gawdzik<sup>2</sup>, Alicja Wzorek<sup>2</sup>, Aleksandra Pawlak<sup>3</sup>, Bożena Obmińska-Mrukowicz<sup>3</sup>, Monika Dymarska<sup>1</sup>, Ewa Kozłowska<sup>1</sup>, Edyta Kostrzewa-Susłow<sup>1</sup> and Tomasz Janeczko<sup>1,\*</sup>

<sup>1</sup>Department of Food Chemistry and Biocatalysis, Wrocław University of Environmental and Life Sciences, Norwida 25, 50-375 Wrocław, Poland

<sup>2</sup>Institute of Chemistry, Jan Kochanowski University in Kielce, Uniwersytecka 7, 25-406 Kielce, Poland;

<sup>3</sup>Department of Pharmacology and Toxicology, Wrocław University of Environmental and Life Sciences, C.K. Norwida 31, 50-375 Wrocław, Poland

\* Correspondence: janeczko13@interia.pl (T.J.); Tel.: +48-713-205-195 (T.J.)

e.a.kozłowska@gmail.com (E.K.), kaczanowskad@gmail.com (D.K.), b.gawdzik@ujk.edu.pl (B.G.), alicja.wzorek@ujk.edu.pl (A.W.), aleksandra.pawlak@upwr.edu.pl (A.P.), beatriz.hernandez-suarez@upwr.edu.pl (B.H.S.), monika.dymarska@upwr.edu.pl (M.D.), ewa.kozłowska1@upwr.edu.pl (E.K.), edyta.kostrzewa-suslow@upwr.edu.pl (E.K-S.)

### Contents:

- Figure S1. <sup>1</sup>H NMR spectral of 1-(2'-hydroxyphenyl)-3-(2''-bromophenyl)-prop-2-en-1-one (1) (CDCl<sub>3</sub>, 600 MHz)
- Figure S2. Part of the <sup>13</sup>C NMR spectral of 1-(2'-hydroxyphenyl)-3-(2''-bromophenyl)-prop-2-en-1-one (1) (CDCl<sub>3</sub>, 600 MHz)
- Figure S3. <sup>13</sup>C NMR spectral of 1-(2'-hydroxyphenyl)-3-(2''-bromophenyl)-prop-2-en-1-one (1) (CDCl<sub>3</sub>, 151 MHz)
- Figure S4. COSY spectral of 1-(2'-hydroxyphenyl)-3-(2''-bromophenyl)-prop-2-en-1-one (1) (CDCl<sub>3</sub>, 151 MHz)
- Figure S5. HSQC spectral of 1-(2'-hydroxyphenyl)-3-(2''-bromophenyl)-prop-2-en-1-one (1) (CDCl<sub>3</sub>, 151 MHz)
- Figure S6. <sup>1</sup>H NMR spectral of 1-(2'-hydroxyphenyl)-3-(2''-bromophenyl)-propan-1-one (5) (CDCl<sub>3</sub>, 600 MHz)
- Figure S7. Part of the <sup>13</sup>C NMR spectral of 1-(2'-hydroxyphenyl)-3-(2''-bromophenyl)-propan-1-one (5) (CDCl<sub>3</sub>, 600 MHz)
- Figure S8. <sup>13</sup>C NMR spectral of 1-(2'-hydroxyphenyl)-3-(2''-bromophenyl)-propan-1-one (5) (CDCl<sub>3</sub>, 151 MHz)
- Figure S9. Part of the <sup>13</sup>C NMR spectral of 1-(2'-hydroxyphenyl)-3-(2''-bromophenyl)-propan-1-one (5) (CDCl<sub>3</sub>, 151 MHz)
- Figure S10. COSY spectral of 1-(2'-hydroxyphenyl)-3-(2''-bromophenyl)-propan-1-one (5) (CDCl<sub>3</sub>, 151 MHz)
- Figure S11. Part of the COSY spectral of 1-(2'-hydroxyphenyl)-3-(2''-bromophenyl)-propan-1-one (5) (CDCl<sub>3</sub>, 151 MHz)
- Figure S12. HSQC spectral of 1-(2'-hydroxyphenyl)-3-(2''-bromophenyl)-propan-1-one (5) (CDCl<sub>3</sub>, 151 MHz)
- Figure S13. HMBC spectral of 1-(2'-hydroxyphenyl)-3-(2''-bromophenyl)-propan-1-one (5) (CDCl<sub>3</sub>, 151 MHz)
- Figure S14. <sup>1</sup>H NMR spectral of 1-(2'-hydroxyphenyl)-3-(3''-bromophenyl)-prop-2-en-1-one (2) (CDCl<sub>3</sub>, 600 MHz)
- Figure S15. Part of the <sup>13</sup>C NMR spectral of 1-(2'-hydroxyphenyl)-3-(3''-bromophenyl)-prop-2-en-1-one (2) (CDCl<sub>3</sub>, 600 MHz)

Figure S16.  $^{13}\text{C}$  NMR spectral of 1-(2'-hydroxyphenyl)-3-(3''-bromophenyl)-prop-2-en-1-one (**2**) ( $\text{CDCl}_3$ , 151 MHz)

Figure S17. COSY spectral of 1-(2'-hydroxyphenyl)-3-(3''-bromophenyl)-prop-2-en-1-one (**2**) ( $\text{CDCl}_3$ , 151 MHz)

Figure S18. HSQC spectral of 1-(2'-hydroxyphenyl)-3-(3''-bromophenyl)-prop-2-en-1-one (**2**) ( $\text{CDCl}_3$ , 151 MHz)

Figure S19.  $^1\text{H}$  NMR spectral of 1-(2'-hydroxyphenyl)-3-(3''-bromophenyl)-propan-1-one (**6**) ( $\text{CDCl}_3$ , 600 MHz)

Figure S20. Part of the  $^{13}\text{C}$  NMR spectral of 1-(2'-hydroxyphenyl)-3-(3''-bromophenyl)-propan-1-one (**6**) ( $\text{CDCl}_3$ , 600 MHz)

Figure S21.  $^{13}\text{C}$  NMR spectral of 1-(2'-hydroxyphenyl)-3-(3''-bromophenyl)-propan-1-one (**6**) ( $\text{CDCl}_3$ , 151 MHz)

Figure S22. COSY spectral of 1-(2'-hydroxyphenyl)-3-(3''-bromophenyl)-propan-1-one (**6**) ( $\text{CDCl}_3$ , 151 MHz)

Figure S23. HSQC spectral of 1-(2'-hydroxyphenyl)-3-(3''-bromophenyl)-propan-1-one (**6**) ( $\text{CDCl}_3$ , 151 MHz)

Figure S24. HMBC spectral of 1-(2'-hydroxyphenyl)-3-(3''-bromophenyl)-propan-1-one (**6**) ( $\text{CDCl}_3$ , 151 MHz)

Figure S25.  $^1\text{H}$  NMR spectral of 1-(2'-hydroxyphenyl)-3-(4''-bromophenyl)-prop-2-en-1-one (**3**) ( $\text{CDCl}_3$ , 600 MHz)

Figure S26. Part of the  $^1\text{H}$  NMR spectral of 1-(2'-hydroxyphenyl)-3-(4''-bromophenyl)-prop-2-en-1-one (**3**) ( $\text{CDCl}_3$ , 600 MHz)

Figure S27.  $^{13}\text{C}$  NMR spectral of 1-(2'-hydroxyphenyl)-3-(4''-bromophenyl)-prop-2-en-1-one (**3**) ( $\text{CDCl}_3$ , 151 MHz)

Figure S28. COSY spectral of 1-(2'-hydroxyphenyl)-3-(4''-bromophenyl)-prop-2-en-1-one (**3**) ( $\text{CDCl}_3$ , 151 MHz)

Figure S29. HSQC spectral of 1-(2'-hydroxyphenyl)-3-(4''-bromophenyl)-prop-2-en-1-one (**3**) ( $\text{CDCl}_3$ , 151 MHz)

Figure S30.  $^1\text{H}$  NMR spectral of 1-(2'-hydroxyphenyl)-3-(4''-bromophenyl)-propan-1-one (**7**) ( $\text{CDCl}_3$ , 600 MHz)

Figure S31. Part of the  $^{13}\text{C}$  NMR spectral of 1-(2'-hydroxyphenyl)-3-(4''-bromophenyl)-propan-1-one (**7**) ( $\text{CDCl}_3$ , 600 MHz)

Figure S32.  $^{13}\text{C}$  NMR spectral of 1-(2'-hydroxyphenyl)-3-(4''-bromophenyl)-propan-1-one (**7**) ( $\text{CDCl}_3$ , 151 MHz)

Figure S33. COSY spectral of 1-(2'-hydroxyphenyl)-3-(4''-bromophenyl)-propan-1-one (**7**) ( $\text{CDCl}_3$ , 151 MHz)

Figure S34. HSQC spectral of 1-(2'-hydroxyphenyl)-3-(4''-bromophenyl)-propan-1-one (**7**) ( $\text{CDCl}_3$ , 151 MHz)

Figure S35. HMBC spectral of 1-(2'-hydroxyphenyl)-3-(4''-bromophenyl)-propan-1-one (**7**) ( $\text{CDCl}_3$ , 151 MHz)

Figure S36.  $^1\text{H}$  NMR spectral of 1-(5'-bromo-2'-hydroxyphenyl)-3-phenyl-propan-1-one (**4**) ( $\text{CDCl}_3$ , 600 MHz)

Figure S37. Part of the  $^1\text{H}$  NMR spectral of 1-(5'-bromo-2'-hydroxyphenyl)-3-phenyl-propan-1-one (**4**) ( $\text{CDCl}_3$ , 600 MHz)

Figure S38.  $^{13}\text{C}$  NMR spectral of 1-(5'-bromo-2'-hydroxyphenyl)-3-phenyl-propan-1-one (**4**) ( $\text{CDCl}_3$ , 151 MHz)

Figure S39. COSY spectral of 1-(5'-bromo-2'-hydroxyphenyl)-3-phenyl-propan-1-one (**4**) ( $\text{CDCl}_3$ , 151 MHz)

Figure S40. HSQC spectral of 1-(5'-bromo-2'-hydroxyphenyl)-3-phenyl-propan-1-one (**4**) ( $\text{CDCl}_3$ , 151 MHz)

Figure S41.  $^1\text{H}$  NMR spectral of 1-(5'-bromo-2'-hydroxyphenyl)-3-phenyl-prop-2-en-1-one (**8**) ( $\text{CDCl}_3$ , 600 MHz)

Figure S42. Part of the  $^{13}\text{C}$  NMR spectral of 1-(5'-bromo-2'-hydroxyphenyl)-3-phenyl-prop-2-en-1-one (**8**) ( $\text{CDCl}_3$ , 600 MHz)

Figure S43.  $^{13}\text{C}$  NMR spectral of 1-(5'-bromo-2'-hydroxyphenyl)-3-phenyl-prop-2-en-1-one (**8**) ( $\text{CDCl}_3$ , 151 MHz)

Figure S44. COSY spectral of 1-(5'-bromo-2'-hydroxyphenyl)-3-phenyl-prop-2-en-1-one (**8**) ( $\text{CDCl}_3$ , 151 MHz)

Figure S45. HSQC spectral of 1-(5'-bromo-2'-hydroxyphenyl)-3-phenyl-prop-2-en-1-one (**8**) ( $\text{CDCl}_3$ , 151 MHz)

Figure S46. HMBC spectral of 1-(5'-bromo-2'-hydroxyphenyl)-3-phenyl-prop-2-en-1-one (**8**) ( $\text{CDCl}_3$ , 151 MHz)

Figure S47. Preparative TLC plate showing the separation of the post-reaction mixture after biotransformation of 2'-hydroxy-2''-bromochalcone (**1**)

Figure S48. Preparative TLC plate showing the separation of the post-reaction mixture after biotransformation of 2'-hydroxy-3''-bromochalcone (**2**)

Figure S49. Preparative TLC plate showing the separation of the post-reaction mixture after biotransformation of 2'-hydroxy-4''-bromochalcone (**3**)

Figure S50. Preparative TLC plate showing the separation of the post-reaction mixture after biotransformation of 2'-hydroxy-5'-bromochalcone (**4**)

Figure S51. Selected chromatograms showing the composition of the reaction mixtures during the biotransformation of the tested compounds:

- a) GC analysis obtained after 12 hours transformation of 2'-hydroxy-2''-bromochalcone (**1**)
- b) GC analysis obtained after 3 days transformation of 2'-hydroxy-2''-bromochalcone (**2**)
- c) GC analysis obtained after 3 hours transformation of 2'-hydroxy-5'-bromochalcone (**4**)
- d) GC analysis obtained after 10 days transformation of 2'-hydroxy-5'-bromochalcone (**4**)

Figure S1.  $^1\text{H}$  NMR spectral of 1-(2'-hydroxyphenyl)-3-(2''-bromophenyl)-prop-2-en-1-one (**1**) ( $\text{CDCl}_3$ , 600 MHz)

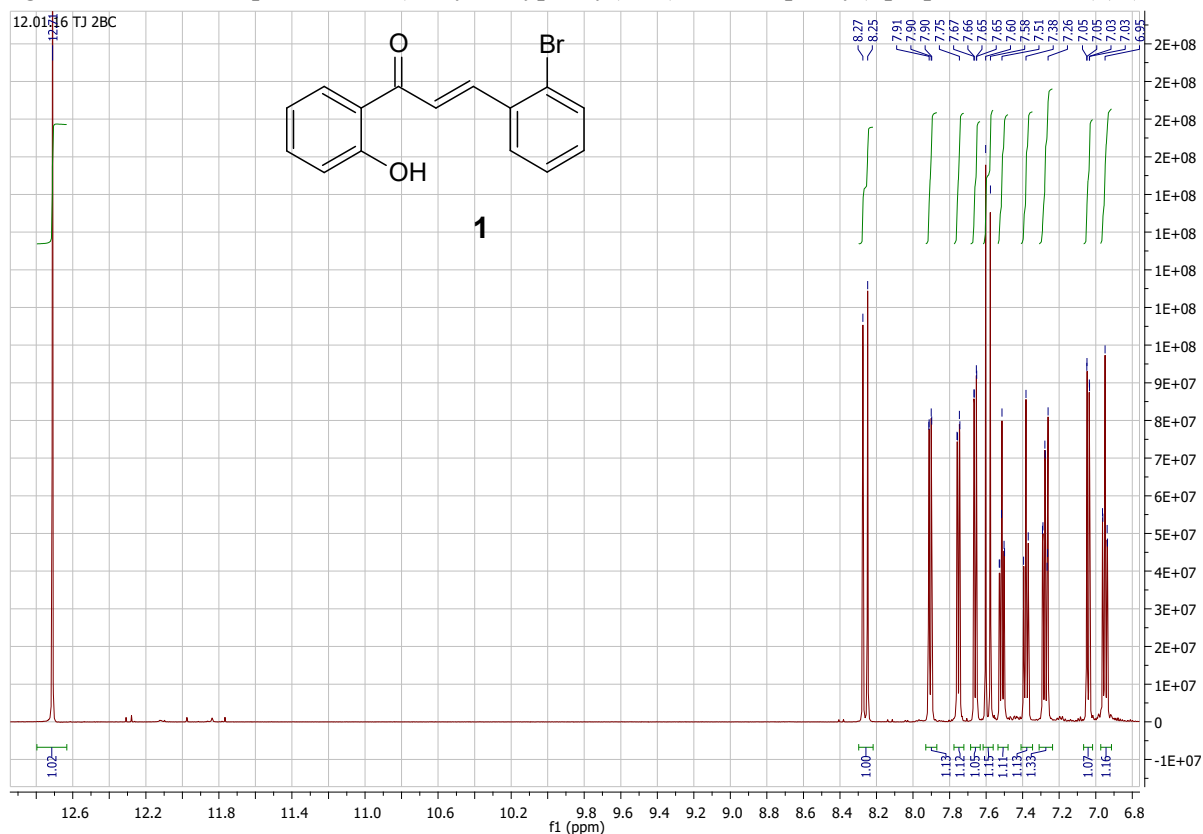

Figure S2. Part of the  $^{13}\text{C}$  NMR spectral of 1-(2'-hydroxyphenyl)-3-(2''-bromophenyl)-prop-2-en-1-one (**1**) ( $\text{CDCl}_3$ , 600 MHz)

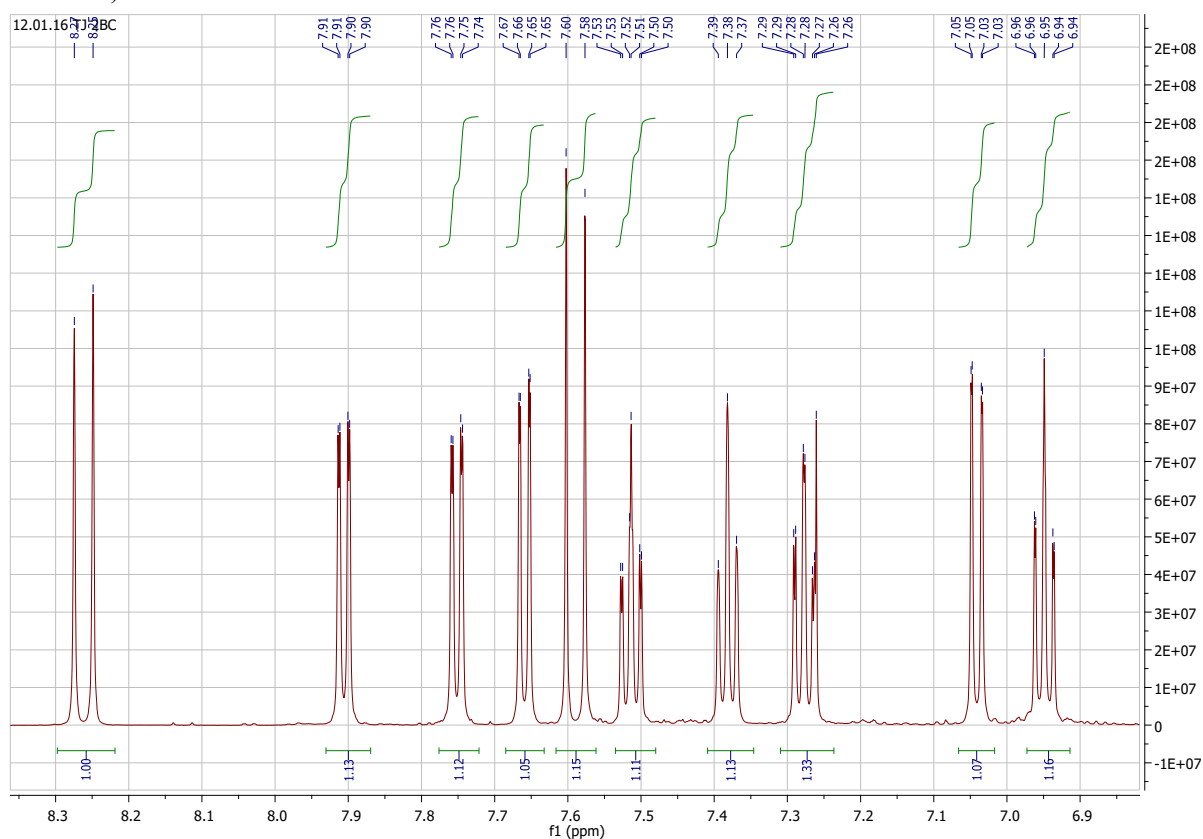

Figure S3.  $^{13}\text{C}$  NMR spectral of 1-(2'-hydroxyphenyl)-3-(2''-bromophenyl)-prop-2-en-1-one (**1**) ( $\text{CDCl}_3$ , 151 MHz)

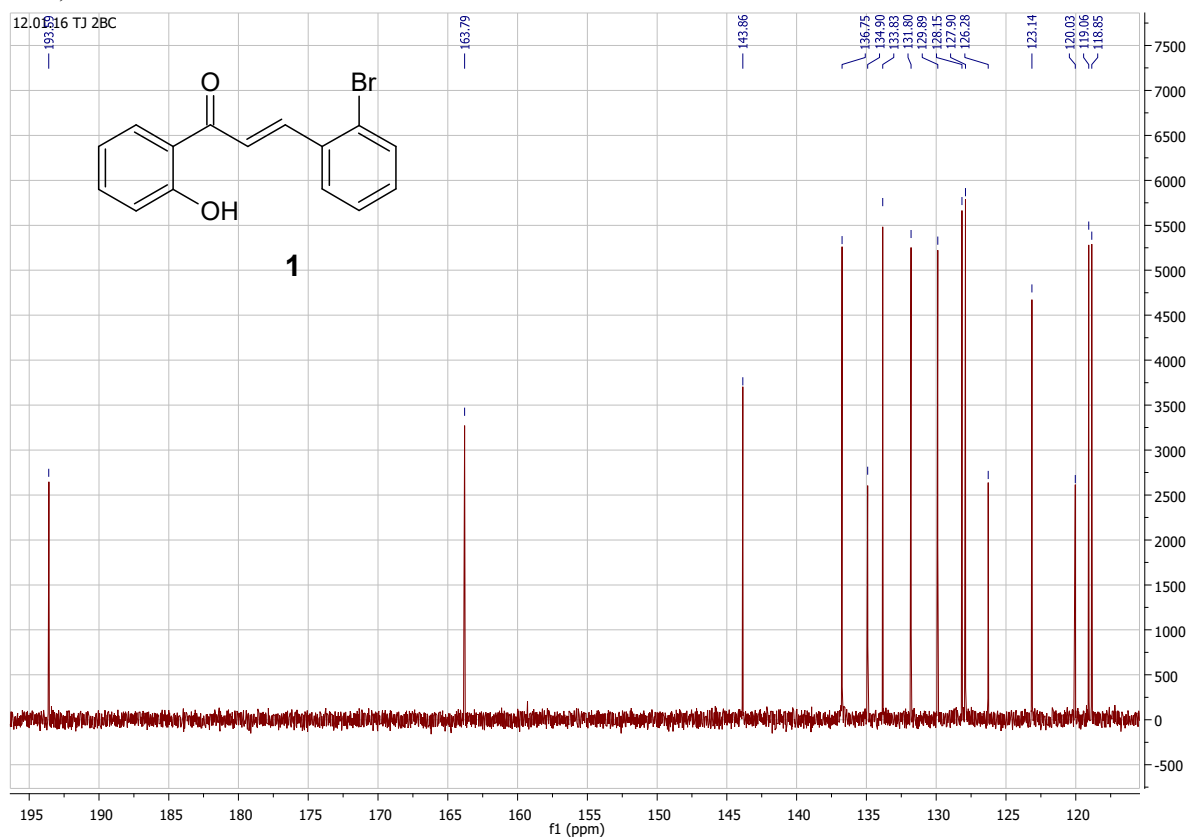

Figure S4. COSY spectral of 1-(2'-hydroxyphenyl)-3-(2''-bromophenyl)-prop-2-en-1-one (**1**) ( $\text{CDCl}_3$ , 151 MHz)

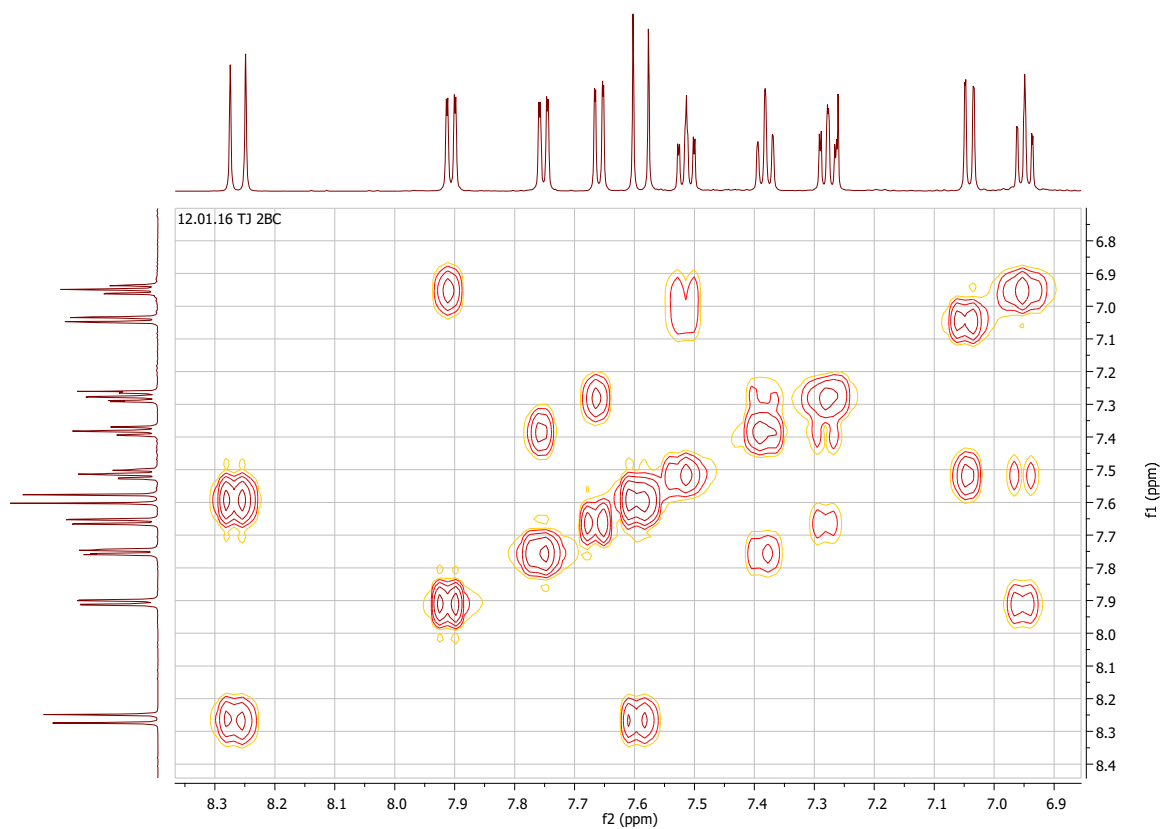

Figure S5. HSQC spectral of 1-(2'-hydroxyphenyl)-3-(2''-bromophenyl)-prop-2-en-1-one (**1**) (CDCl<sub>3</sub>, 151 MHz)

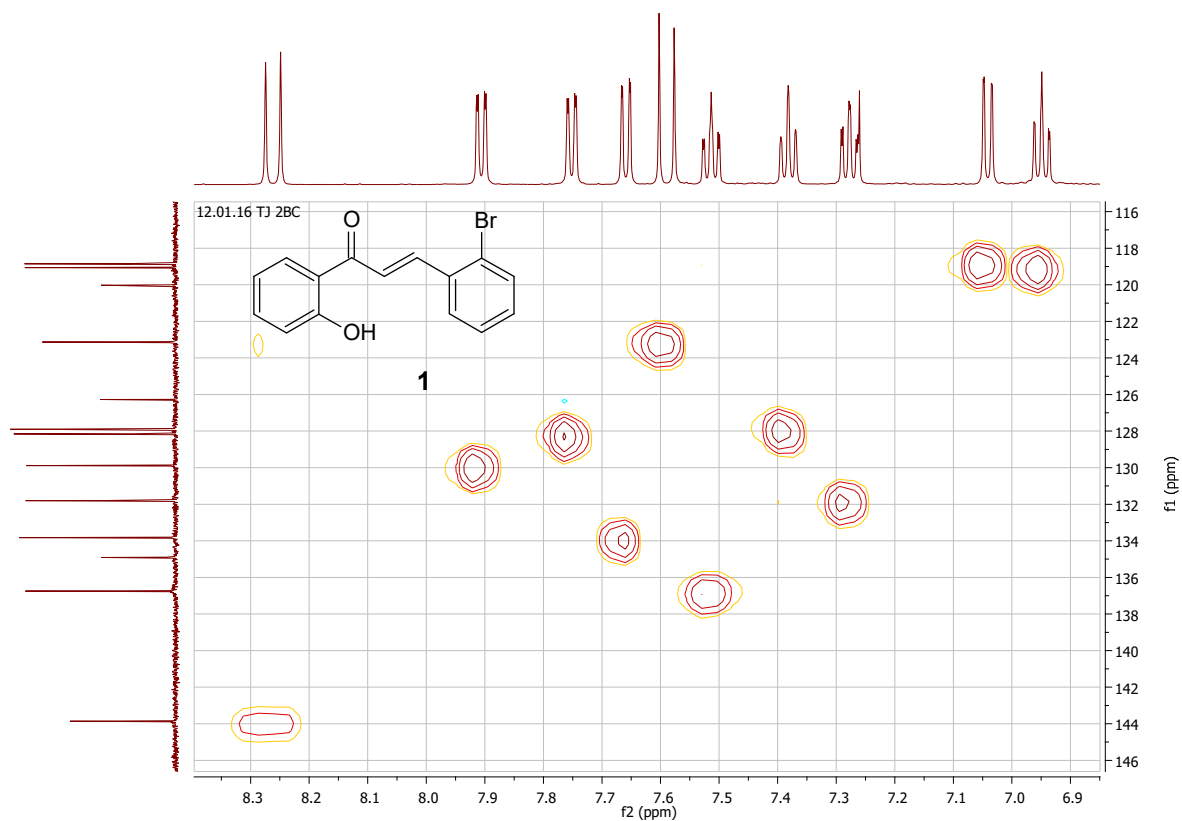

Figure S6. <sup>1</sup>H NMR spectral of 1-(2'-hydroxyphenyl)-3-(2''-bromophenyl)-propan-1-one (**5**) (CDCl<sub>3</sub>, 600 MHz)

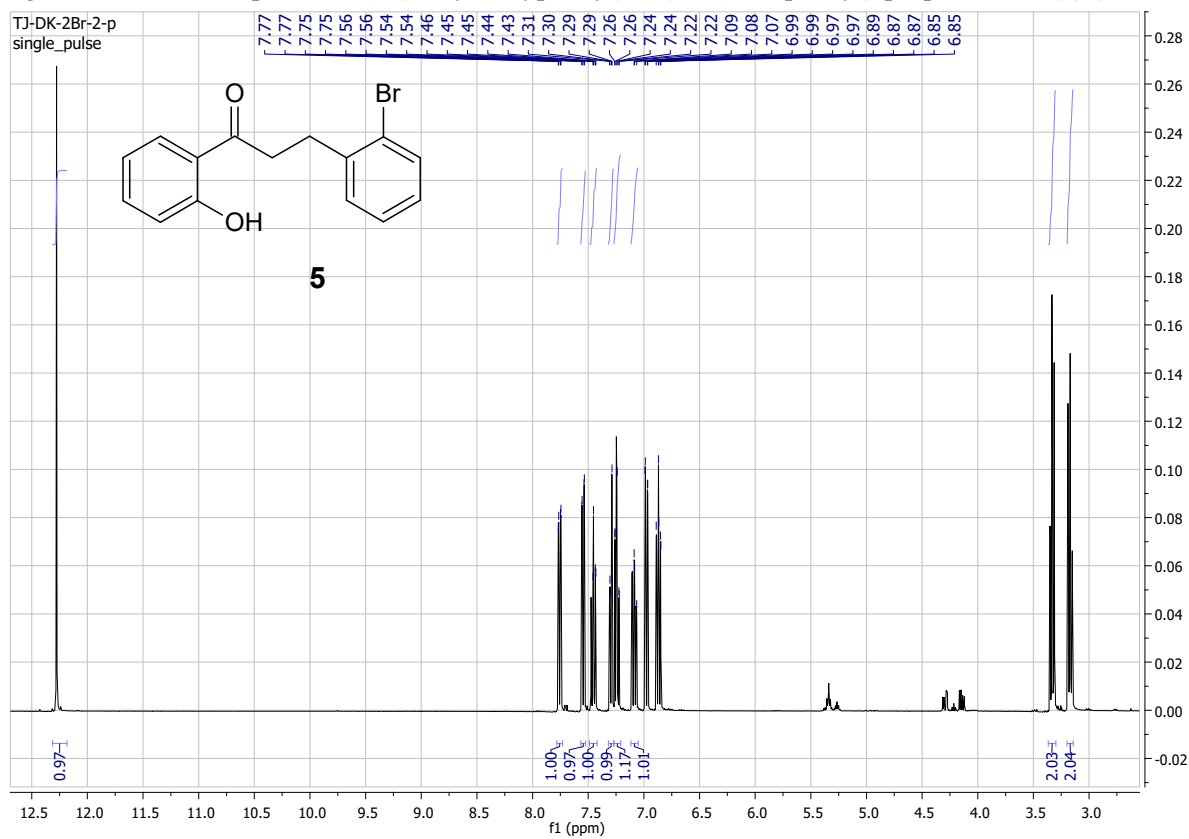

Figure S7. Part of the  $^{13}\text{C}$  NMR spectral of 1-(2'-hydroxyphenyl)-3-(2''-bromophenyl)-propan-1-one (**5**) ( $\text{CDCl}_3$ , 600 MHz)

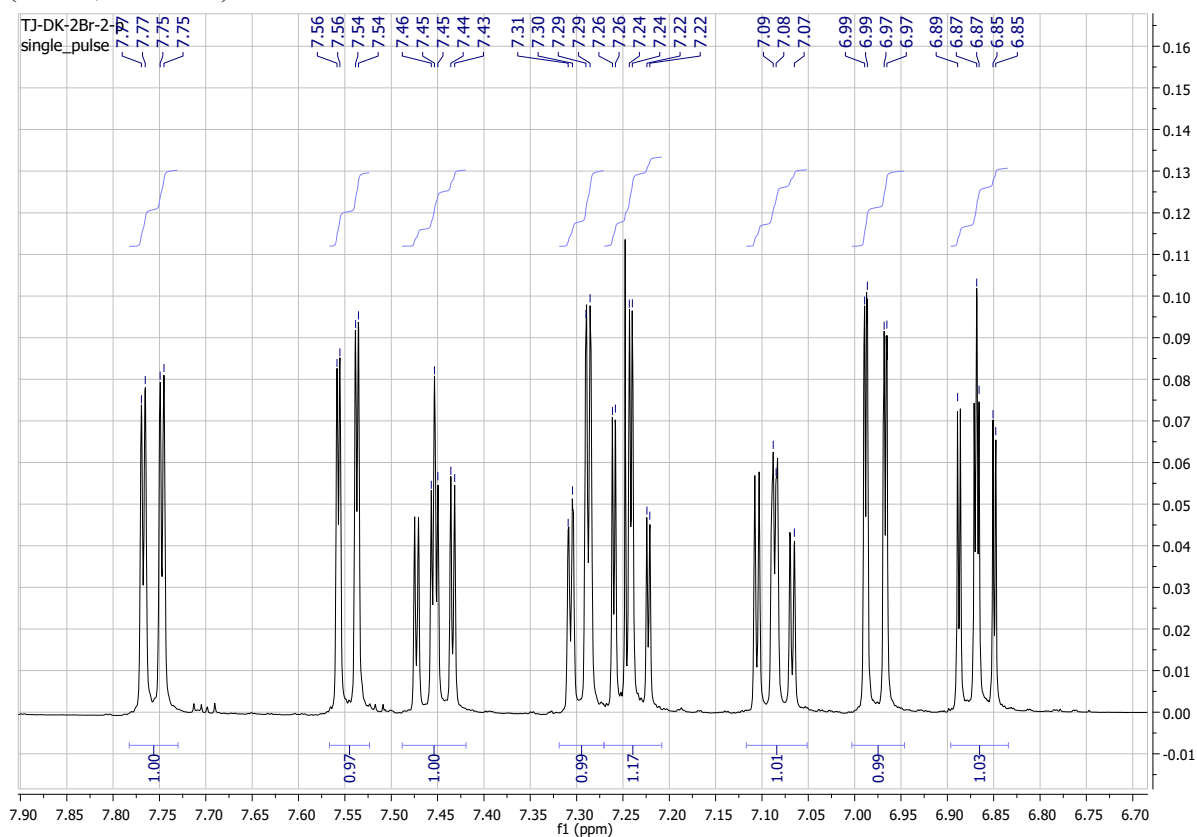

Figure S8.  $^{13}\text{C}$  NMR spectral of 1-(2'-hydroxyphenyl)-3-(2''-bromophenyl)-propan-1-one (**5**) ( $\text{CDCl}_3$ , 151 MHz)

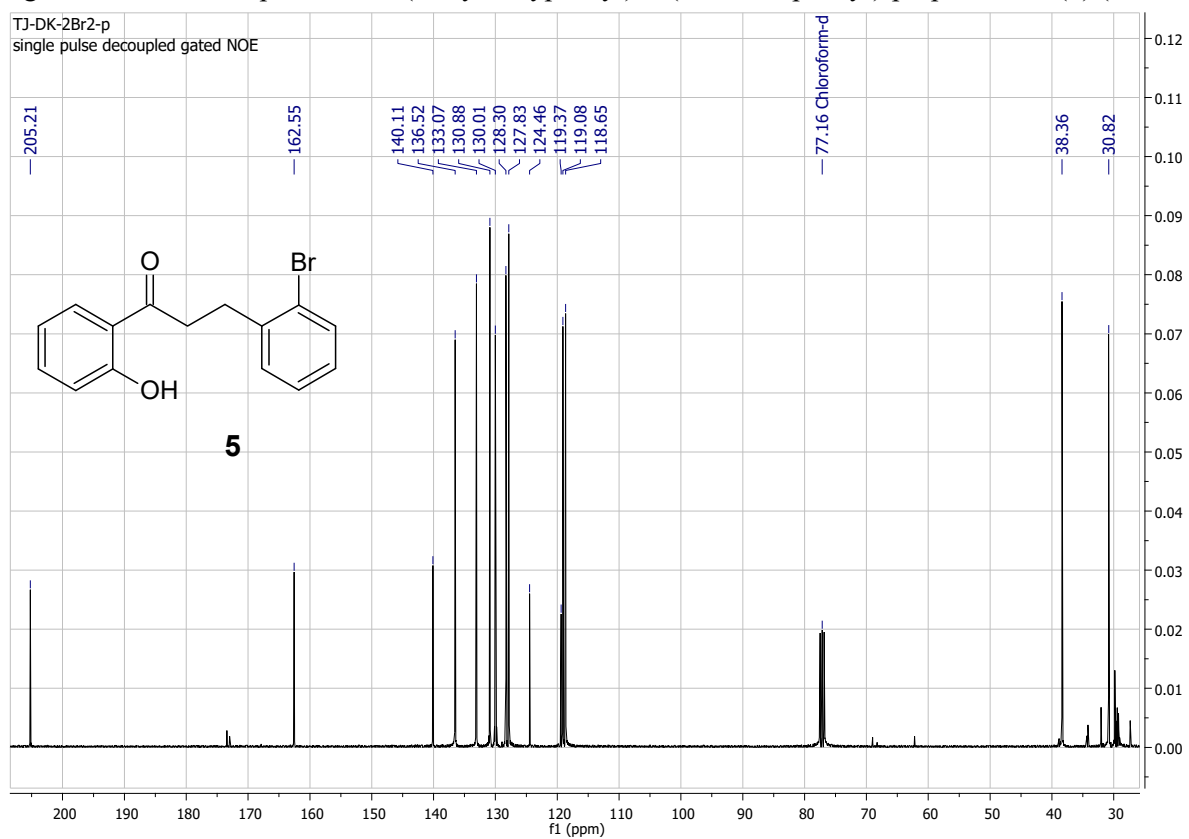

Figure S9. Part of the  $^{13}\text{C}$  NMR spectral of 1-(2'-hydroxyphenyl)-3-(2''-bromophenyl)-propan-1-one (**5**) ( $\text{CDCl}_3$ , 151 MHz)

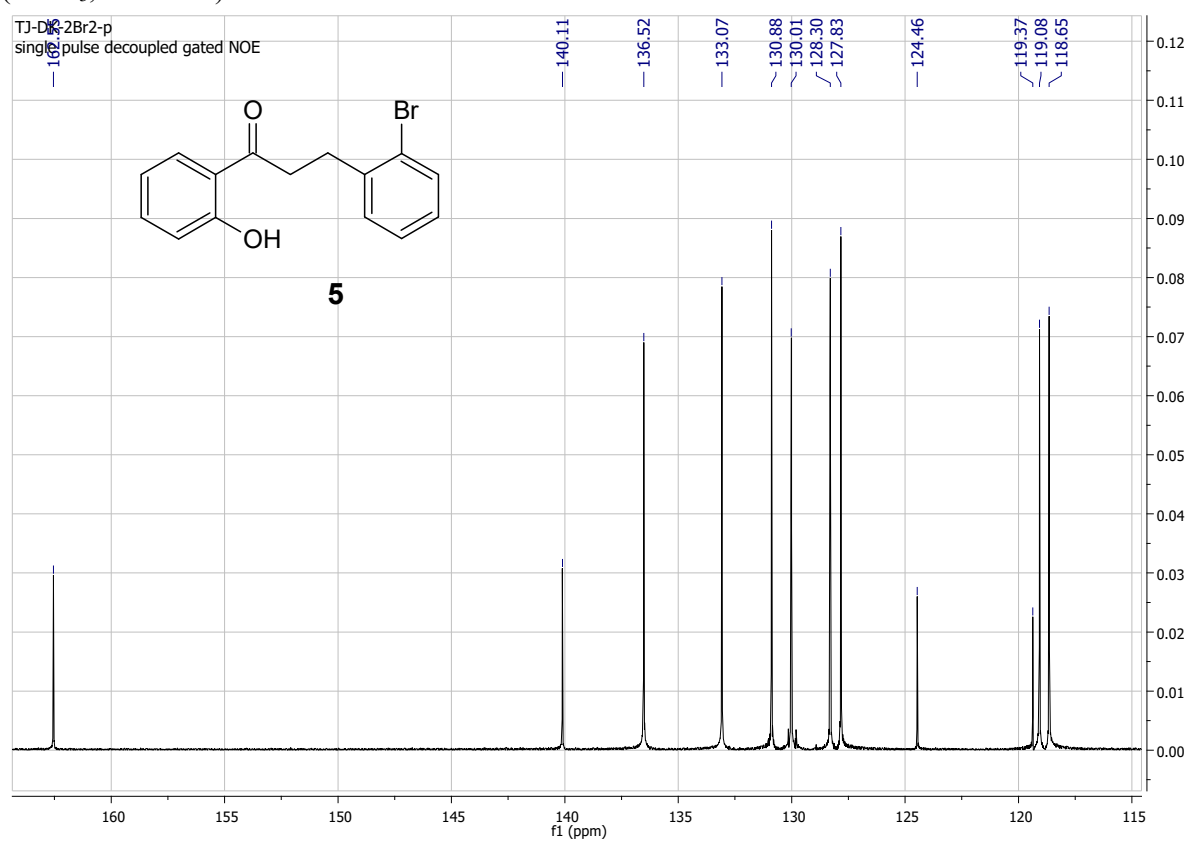

Figure S10. COSY spectral of 1-(2'-hydroxyphenyl)-3-(2''-bromophenyl)-propan-1-one (**5**) ( $\text{CDCl}_3$ , 151 MHz)

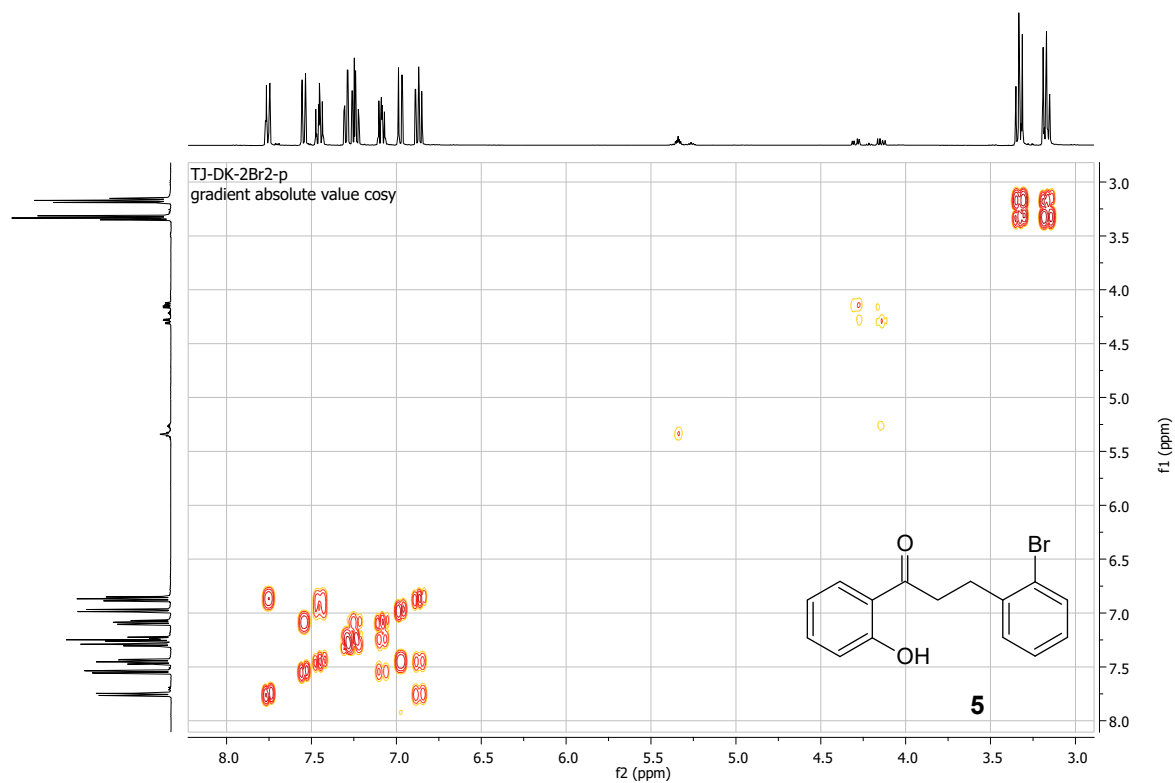



Figure S11. Part of the COSY spectral of 1-(2'-hydroxyphenyl)-3-(2''-bromophenyl)-propan-1-one (**5**) (CDCl<sub>3</sub>, 151 MHz)

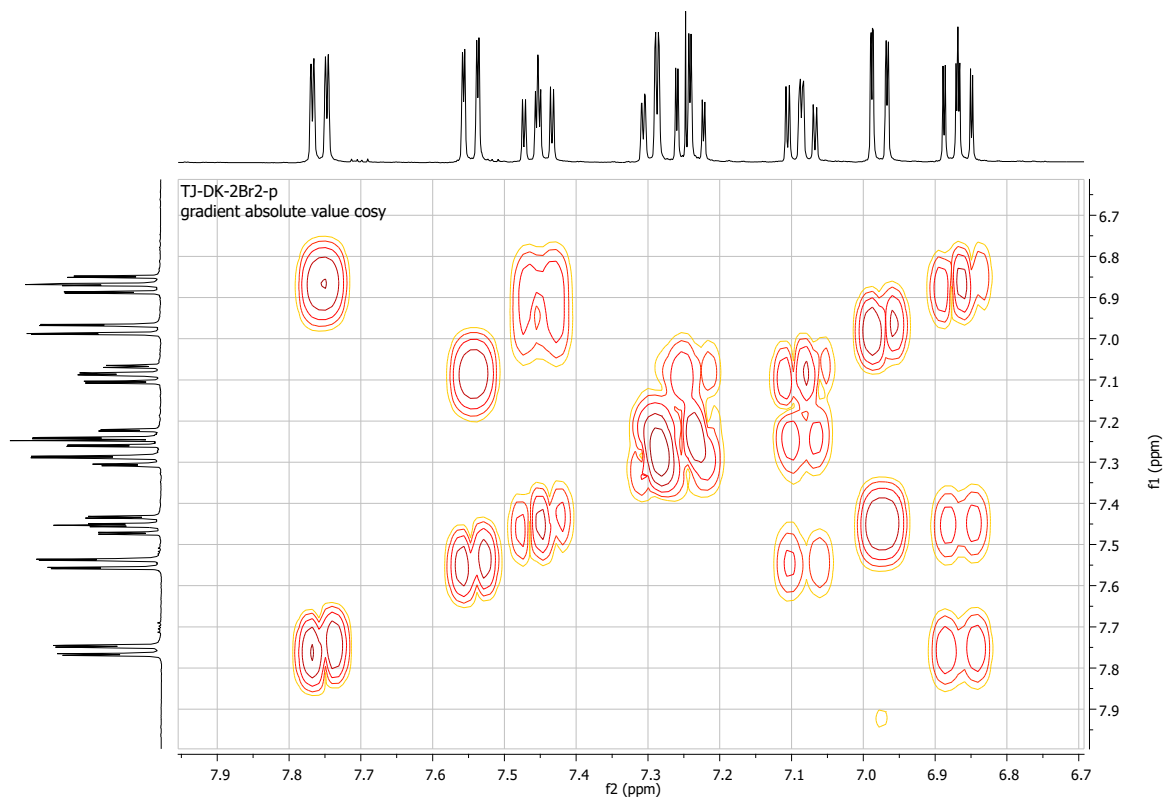

Figure S12. HSQC spectral of 1-(2'-hydroxyphenyl)-3-(2''-bromophenyl)-propan-1-one (**5**) (CDCl<sub>3</sub>, 151 MHz)

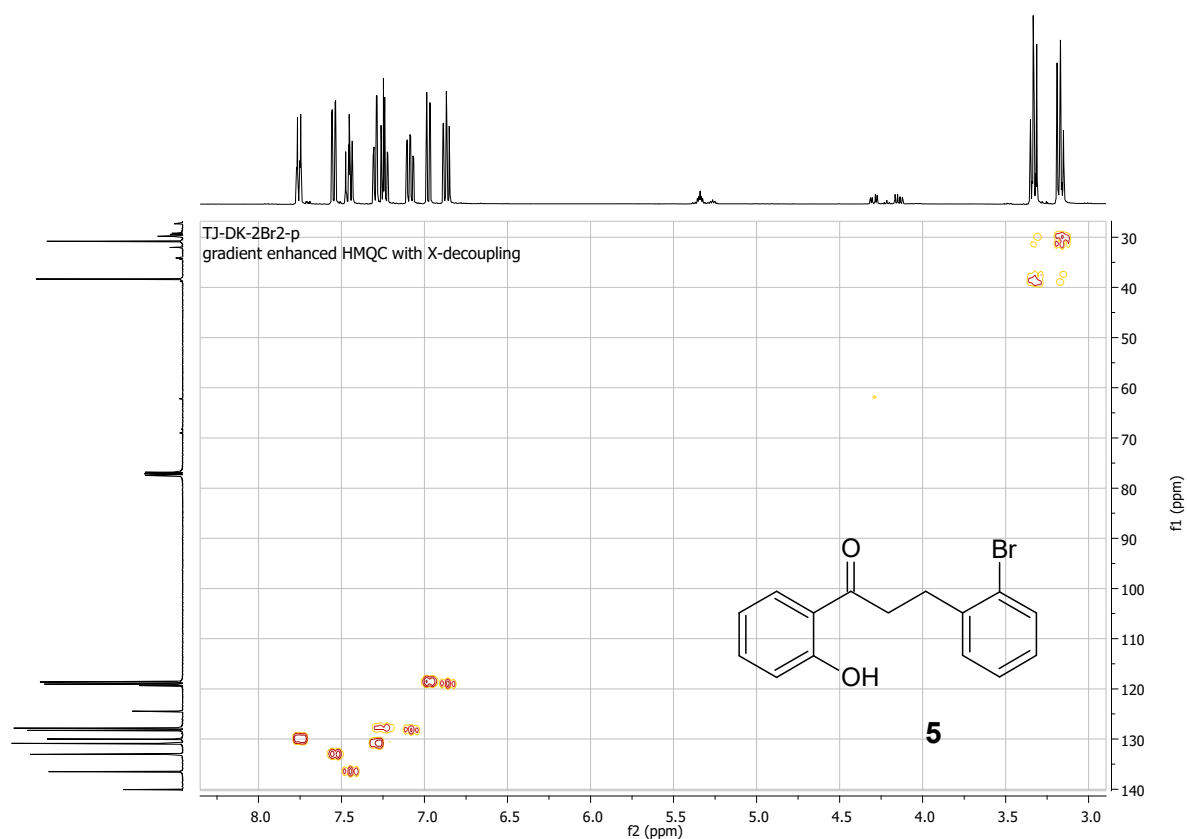

Figure S13. HMBC spectral of 1-(2'-hydroxyphenyl)-3-(2''-bromophenyl)-propan-1-one (**5**) (CDCl<sub>3</sub>, 151 MHz)

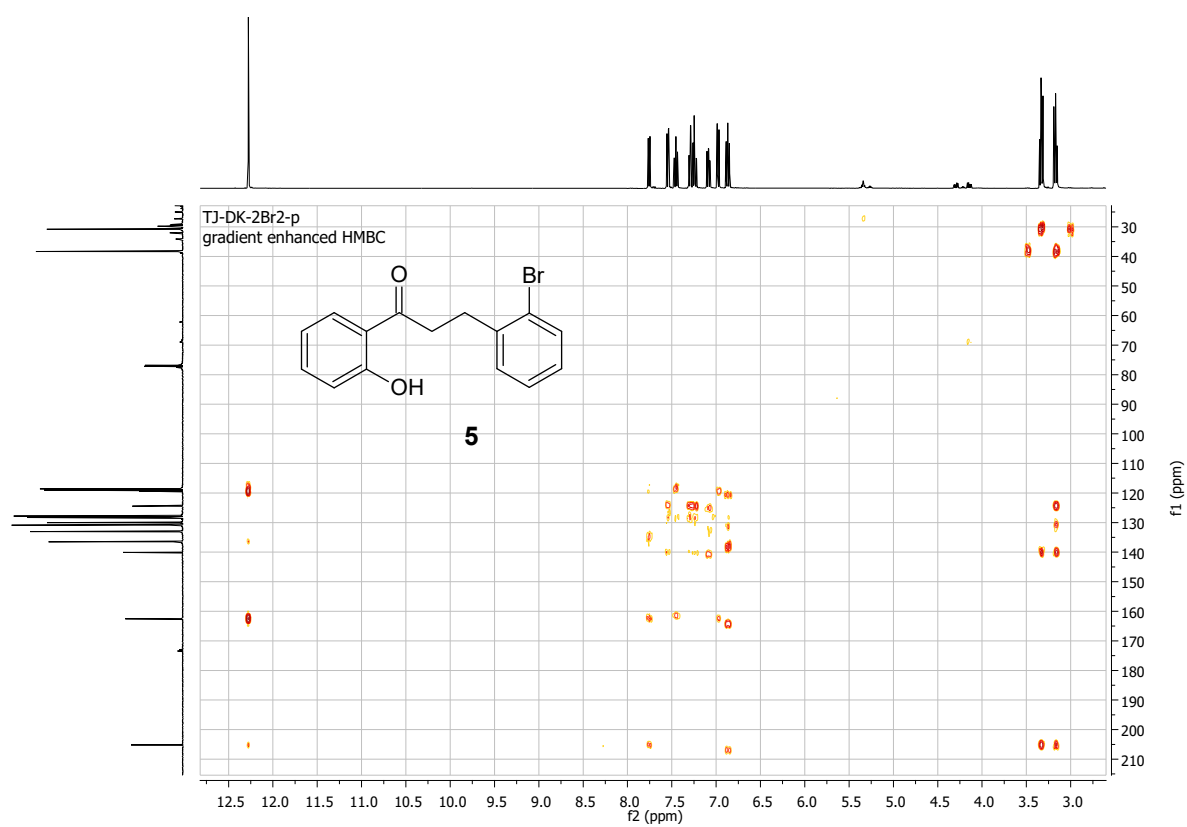

Figure S14. <sup>1</sup>H NMR spectral of 1-(2'-hydroxyphenyl)-3-(3''-bromophenyl)-prop-2-en-1-one (**2**) (CDCl<sub>3</sub>, 600 MHz)

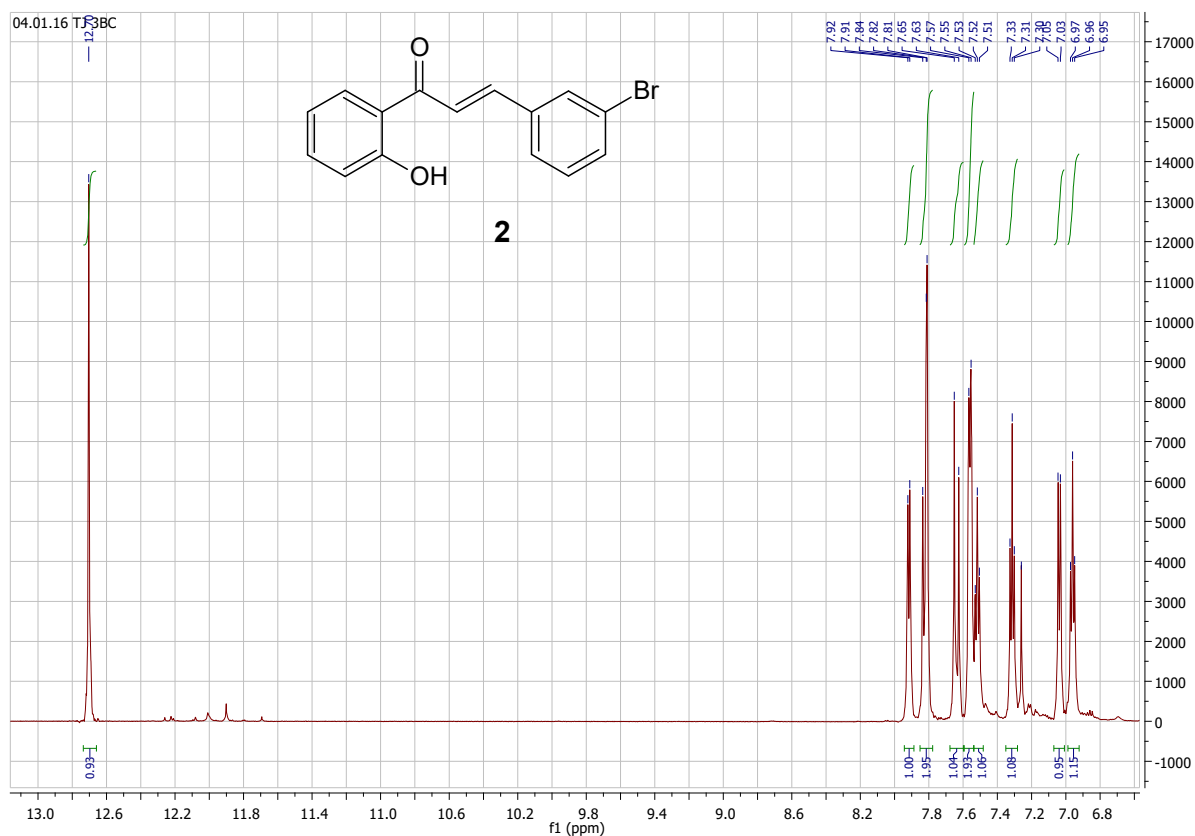

Figure S15. Part of the <sup>13</sup>C NMR spectral of 1-(2'-hydroxyphenyl)-3-(3''-bromophenyl)-prop-2-en-1-one (**2**) (CDCl<sub>3</sub>, 600 MHz)

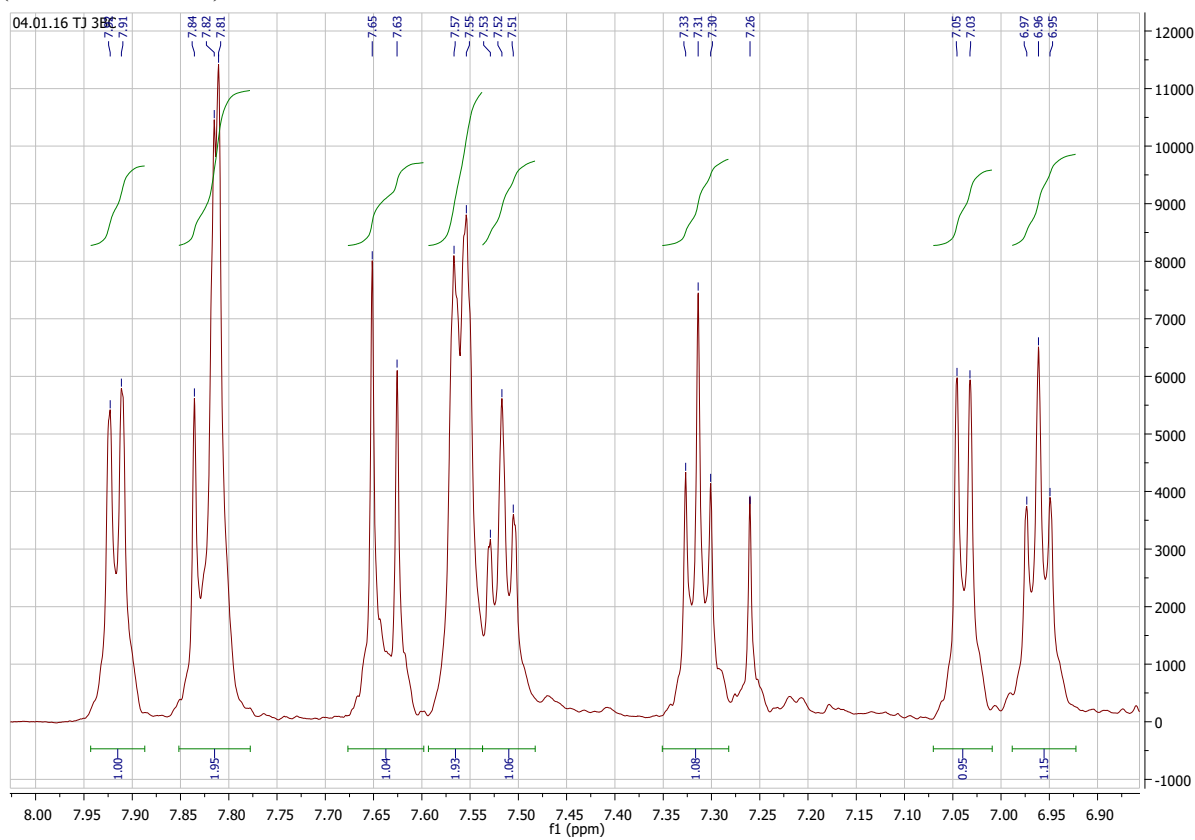

Figure S16. <sup>13</sup>C NMR spectral of 1-(2'-hydroxyphenyl)-3-(3''-bromophenyl)-prop-2-en-1-one (**2**) (CDCl<sub>3</sub>, 151 MHz)

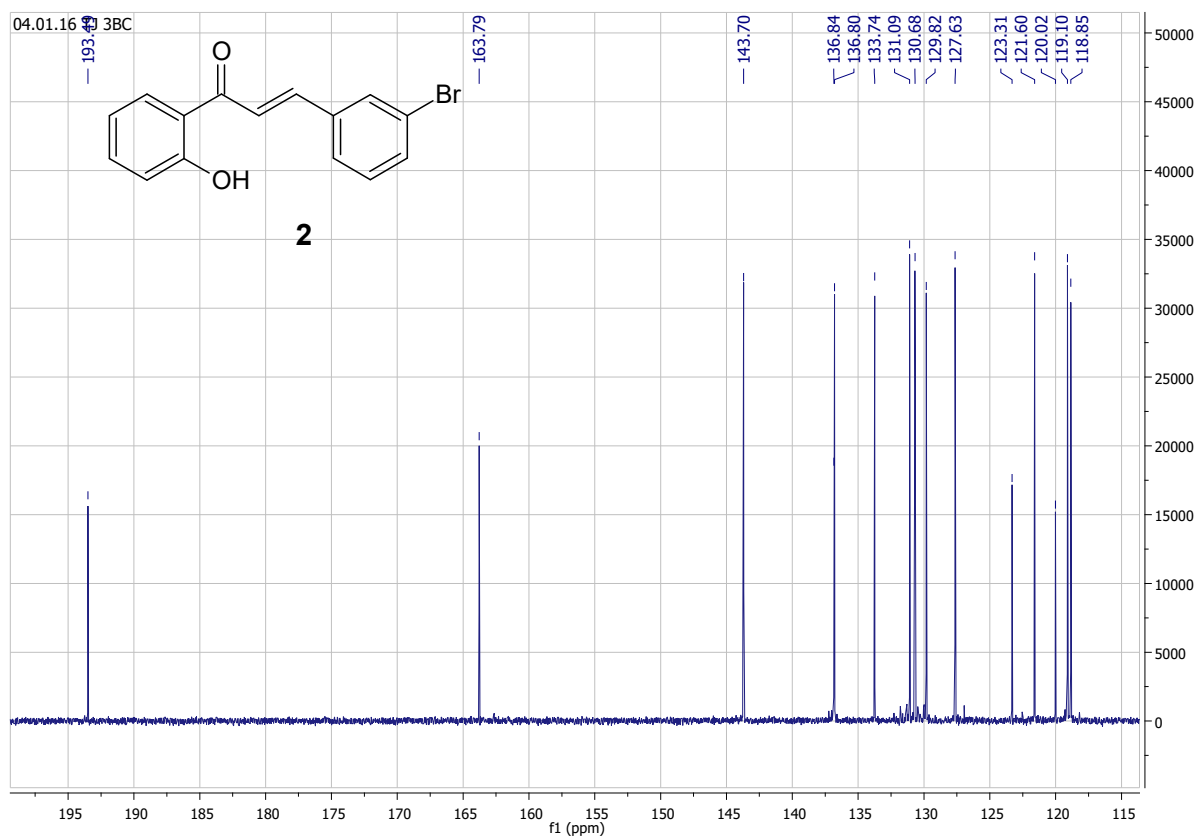

Figure S17. COSY spectral of 1-(2'-hydroxyphenyl)-3-(3''-bromophenyl)-prop-2-en-1-one (**2**) (CDCl<sub>3</sub>, 151 MHz)

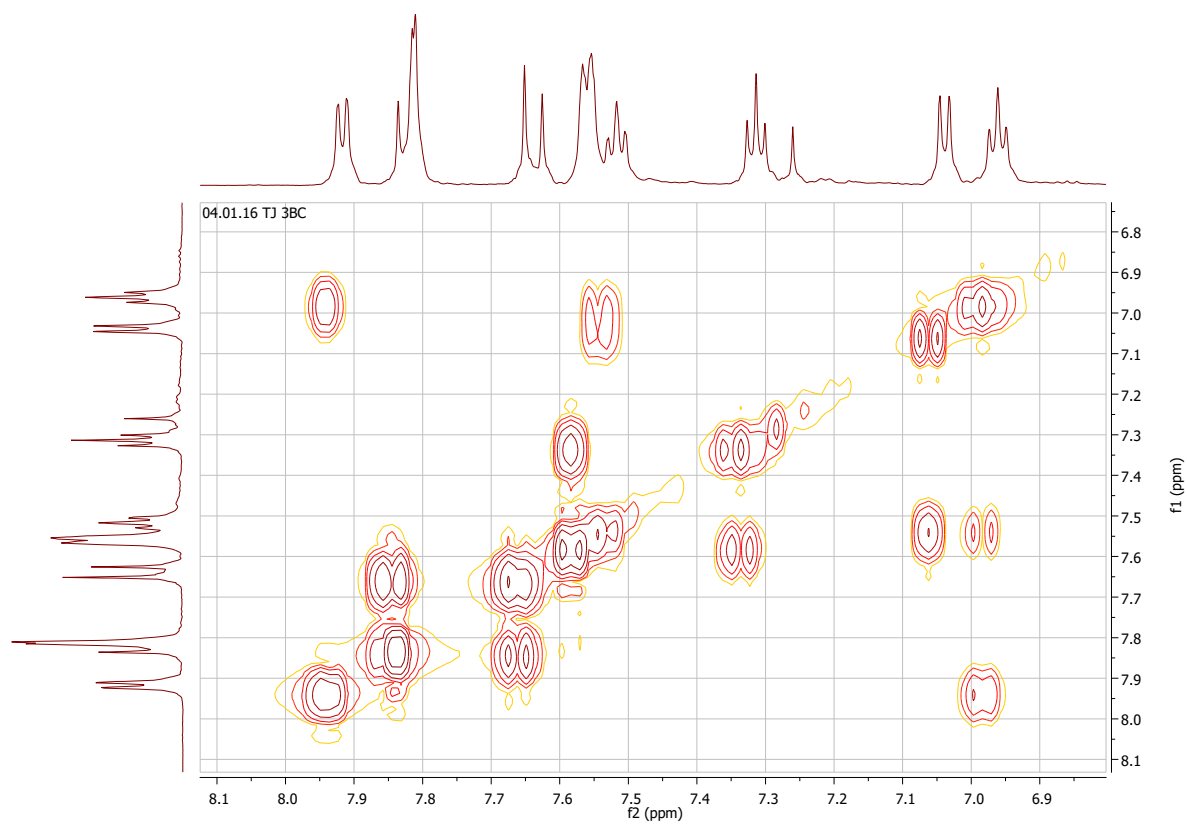

Figure S18. HSQC spectral of 1-(2'-hydroxyphenyl)-3-(3''-bromophenyl)-prop-2-en-1-one (**2**) (CDCl<sub>3</sub>, 151 MHz)

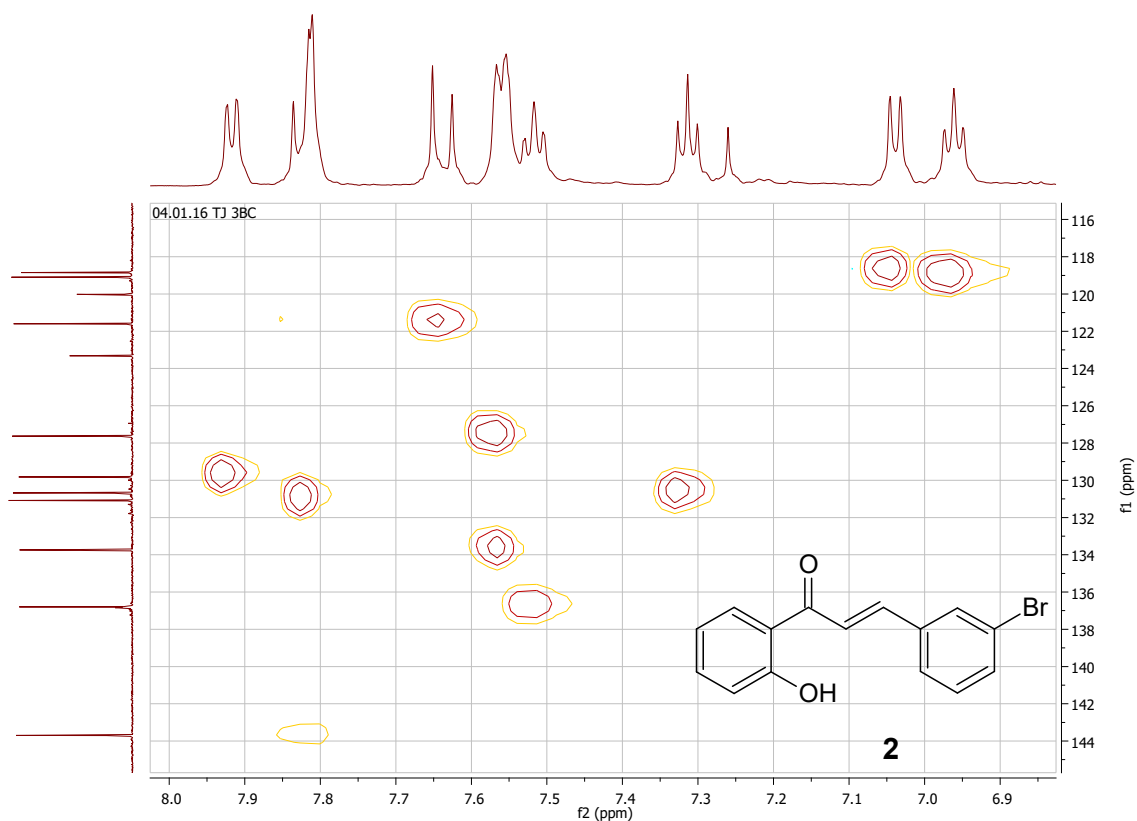

Figure S19.  $^1\text{H}$  NMR spectral of 1-(2'-hydroxyphenyl)-3-(3''-bromophenyl)propan-1-one (**6**) ( $\text{CDCl}_3$ , 600 MHz)

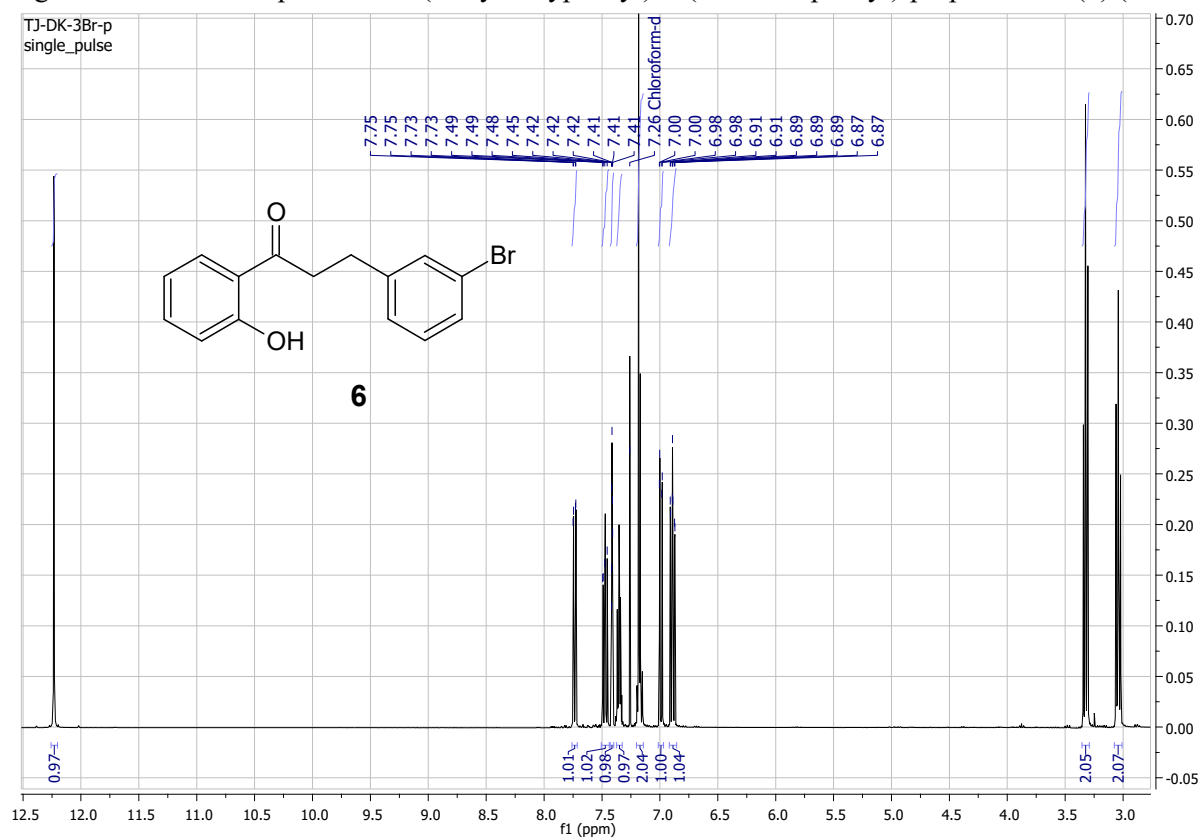

Figure S20. Part of the  $^{13}\text{C}$  NMR spectral of 1-(2'-hydroxyphenyl)-3-(3''-bromophenyl)-propan-1-one (**6**) ( $\text{CDCl}_3$ , 600 MHz)

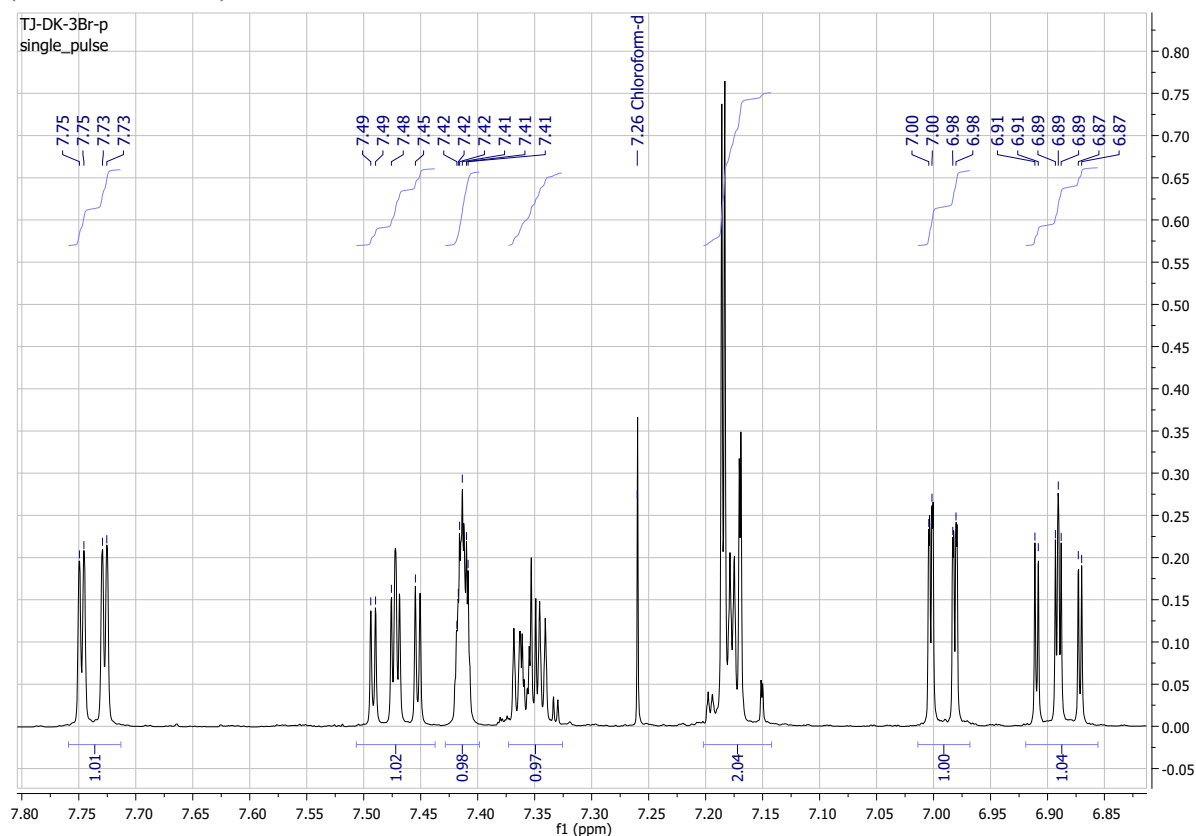

Figure S21.  $^{13}\text{C}$  NMR spectral of 1-(2'-hydroxyphenyl)-3-(3''-bromophenyl)-propan-1-one (**6**) ( $\text{CDCl}_3$ , 151 MHz)

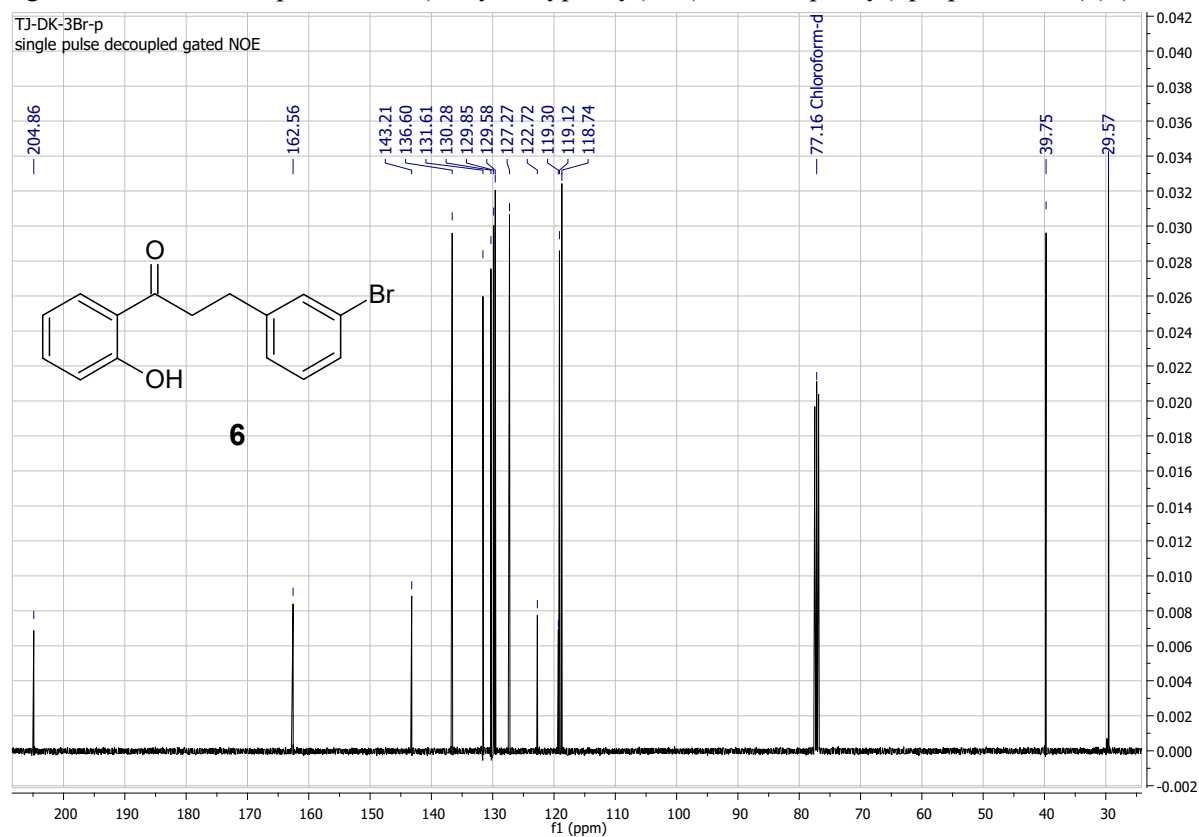

Figure S22. COSY spectral of 1-(2'-hydroxyphenyl)-3-(3''-bromophenyl)-propan-1-one (**6**) (CDCl<sub>3</sub>, 151 MHz)

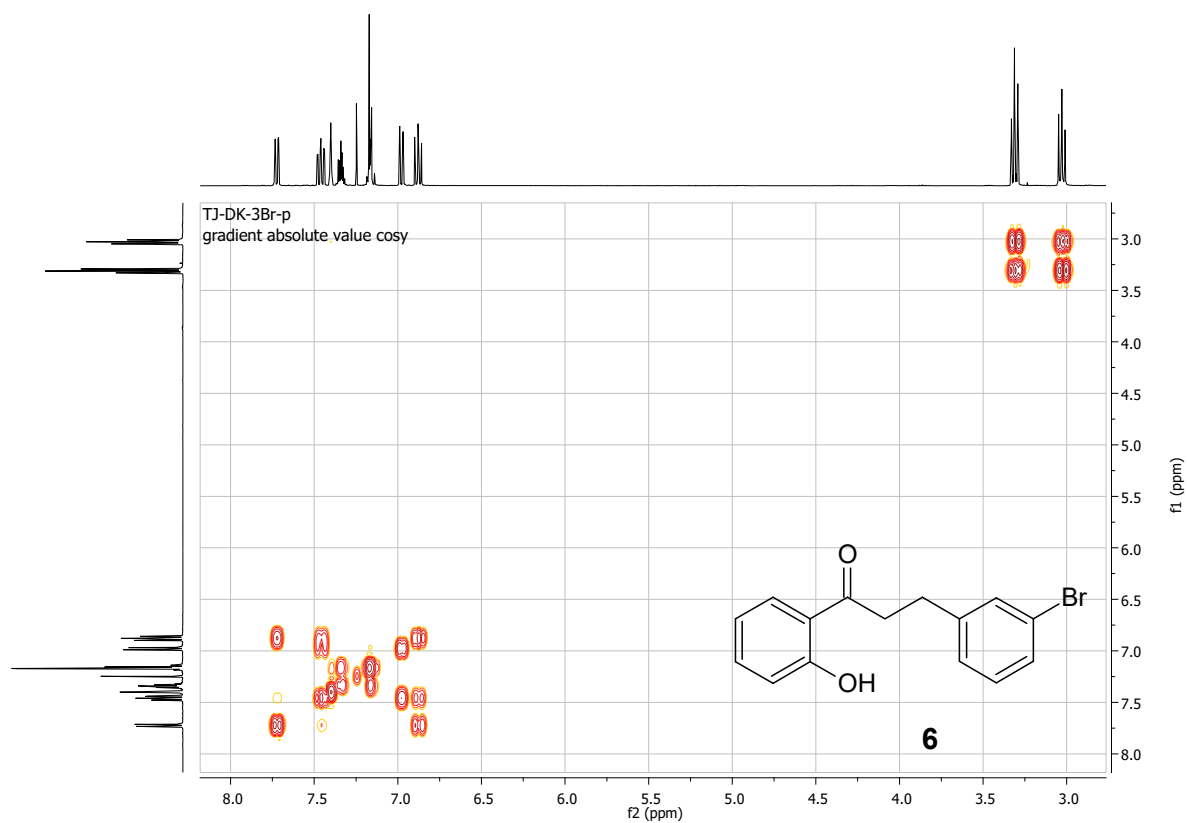

Figure S23. HSQC spectral of 1-(2'-hydroxyphenyl)-3-(3''-bromophenyl)-propan-1-one (**6**) (CDCl<sub>3</sub>, 151 MHz)

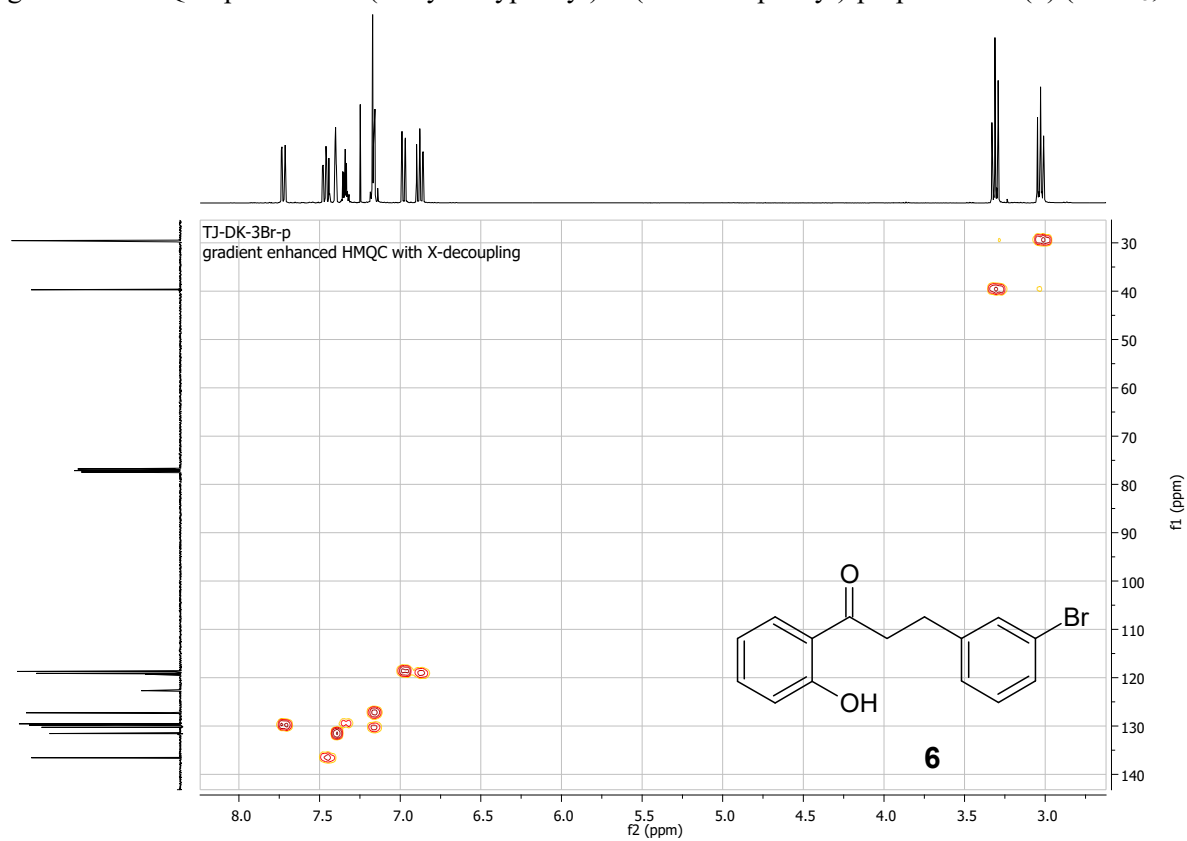

Figure S24. HMBC spectral of 1-(2'-hydroxyphenyl)-3-(3''-bromophenyl)-propan-1-one (**6**) (CDCl<sub>3</sub>, 151 MHz)

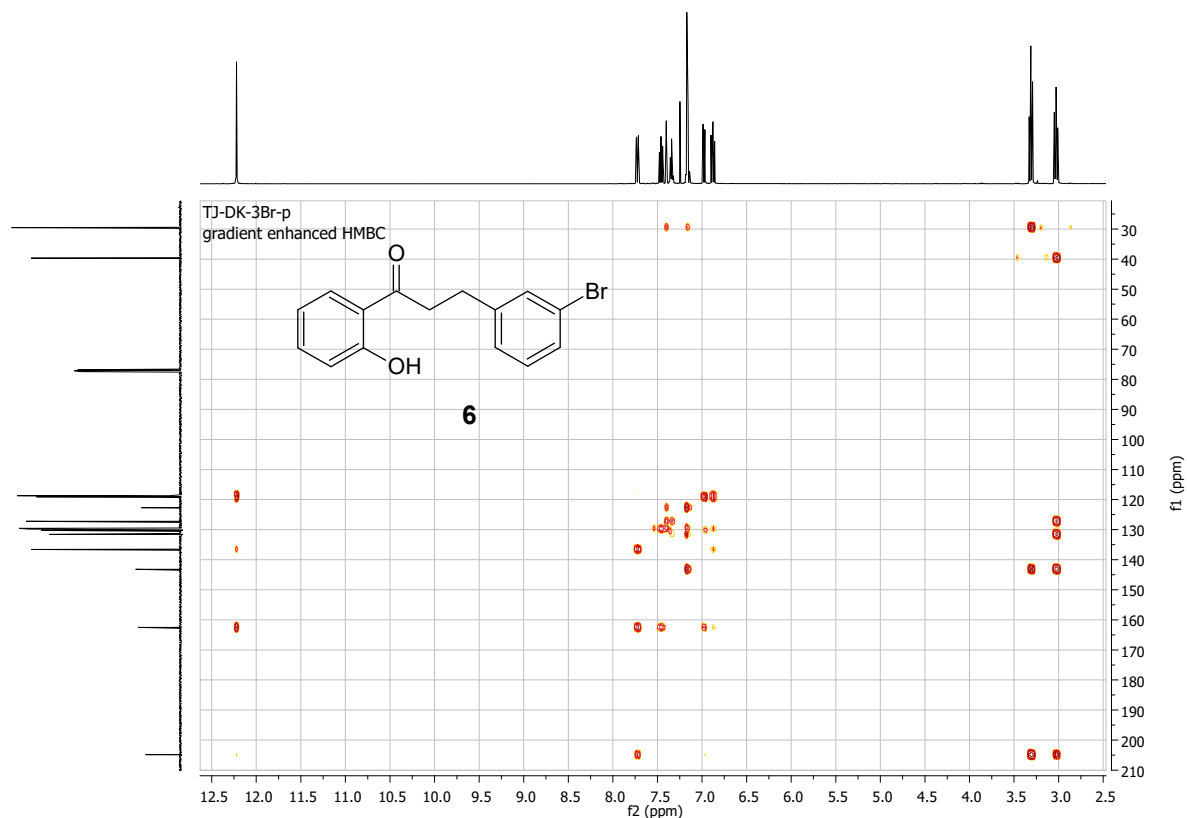

Figure S25. <sup>1</sup>H NMR spectral of 1-(2'-hydroxyphenyl)-3-(4''-bromophenyl)-prop-2-en-1-one (**3**) (CDCl<sub>3</sub>, 600 MHz)

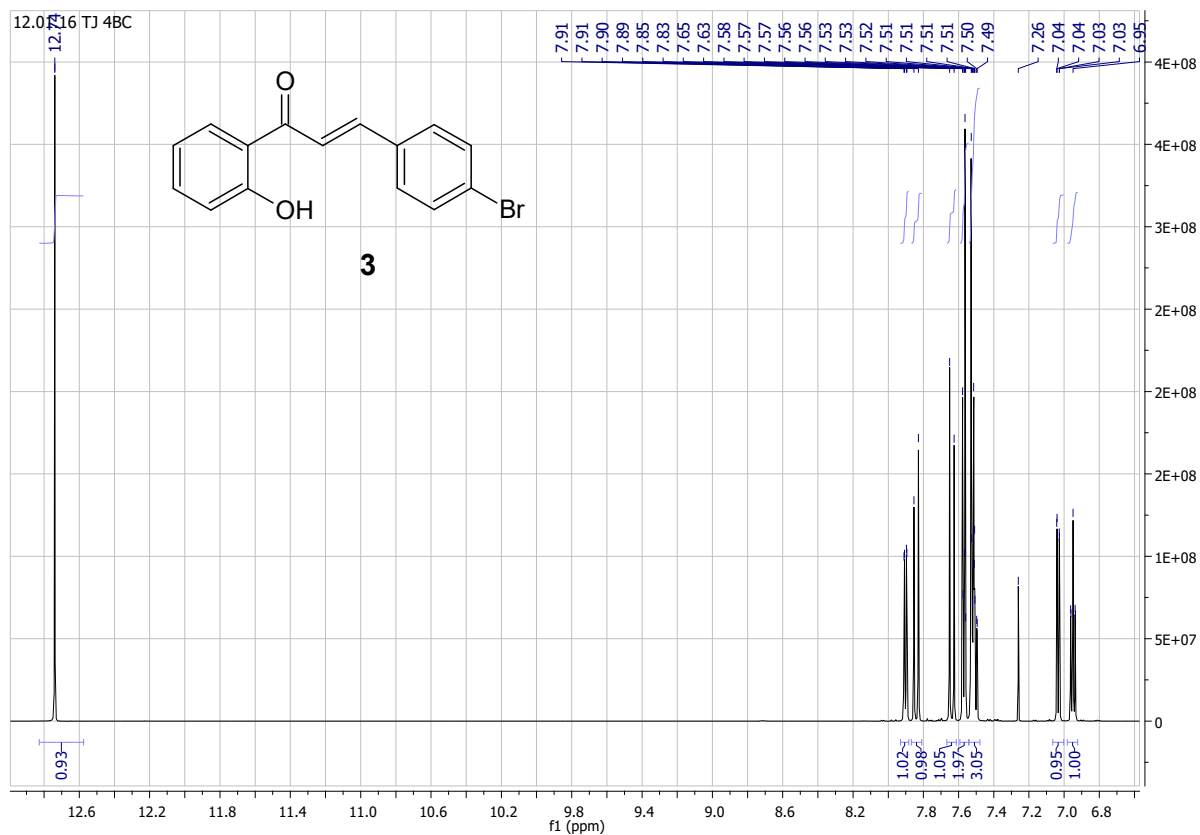



Figure S26. Part of the  $^1\text{H}$  NMR spectral of 1-(2'-hydroxyphenyl)-3-(4''-bromophenyl)-prop-2-en-1-one (**3**) ( $\text{CDCl}_3$ , 600 MHz)

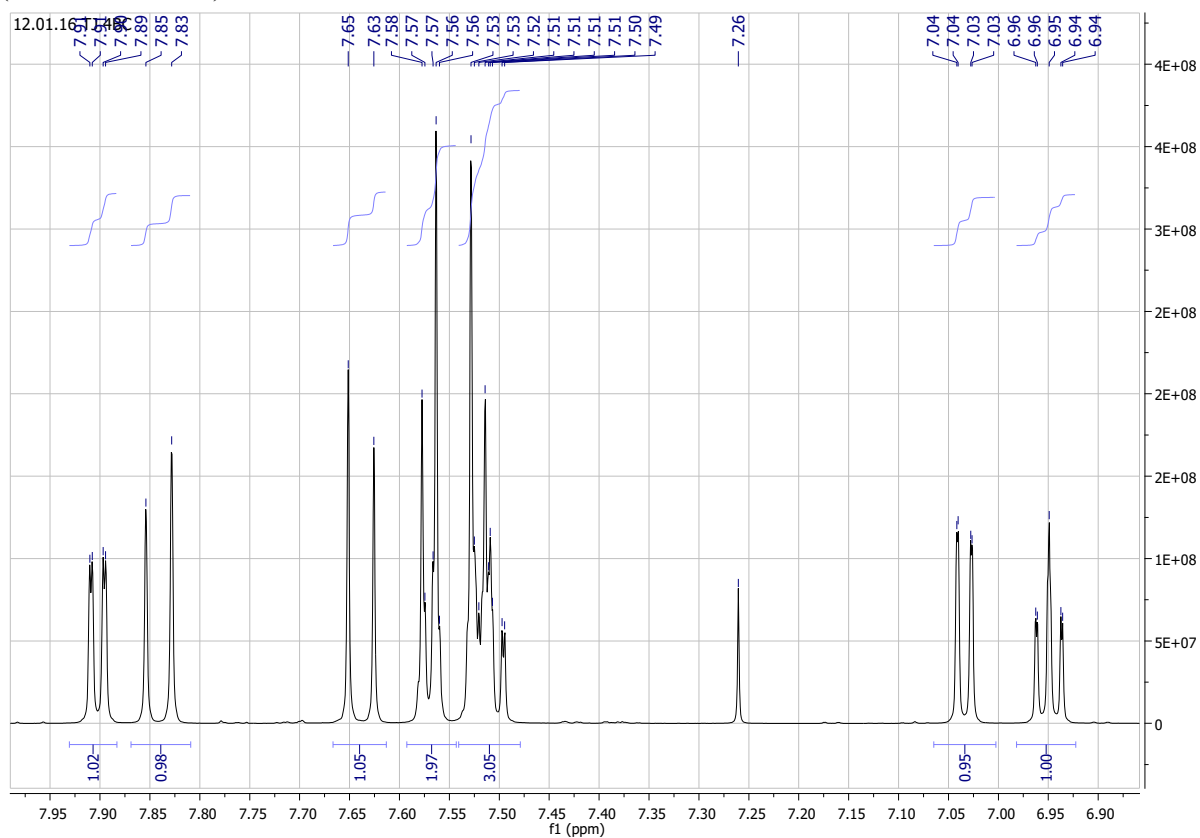

Figure S27.  $^{13}\text{C}$  NMR spectral of 1-(2'-hydroxyphenyl)-3-(4''-bromophenyl)-prop-2-en-1-one (**3**) ( $\text{CDCl}_3$ , 151 MHz)

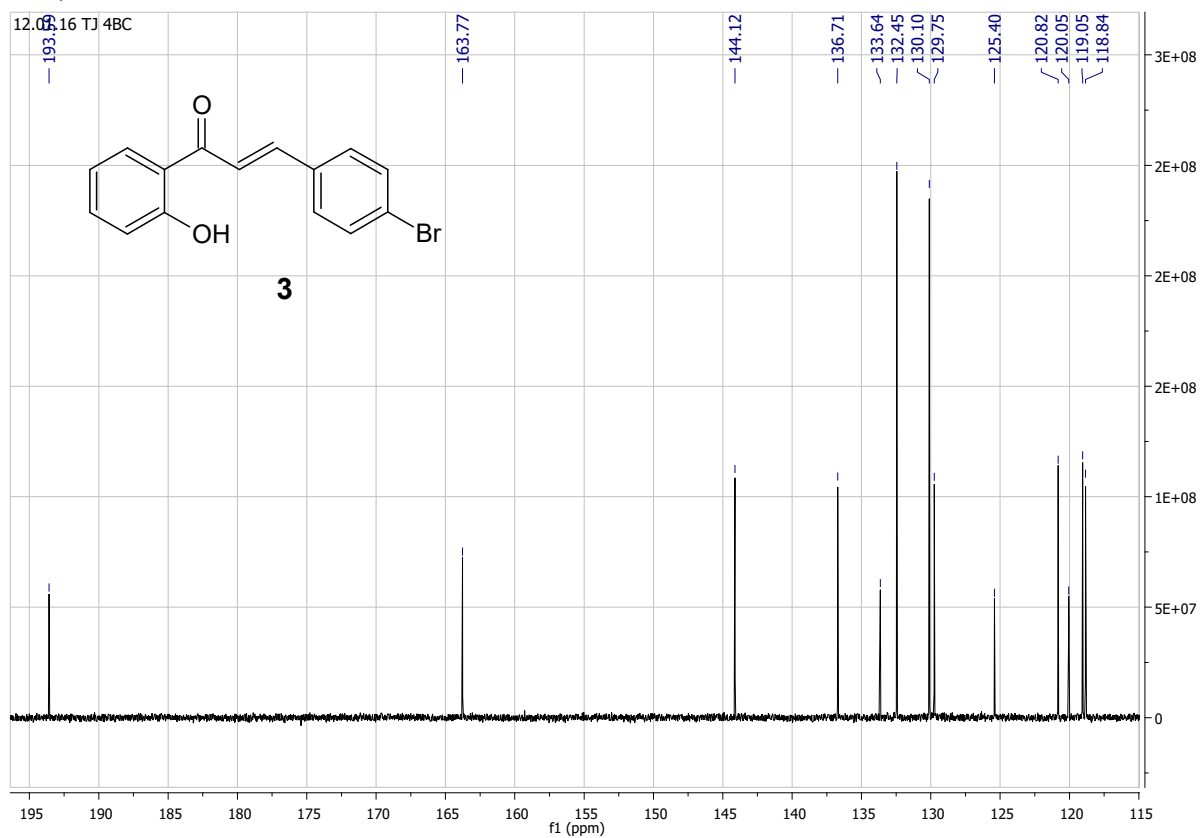

Figure S28. COSY spectral of 1-(2'-hydroxyphenyl)-3-(4''-bromophenyl)-prop-2-en-1-one (**3**) (CDCl<sub>3</sub>, 151 MHz)

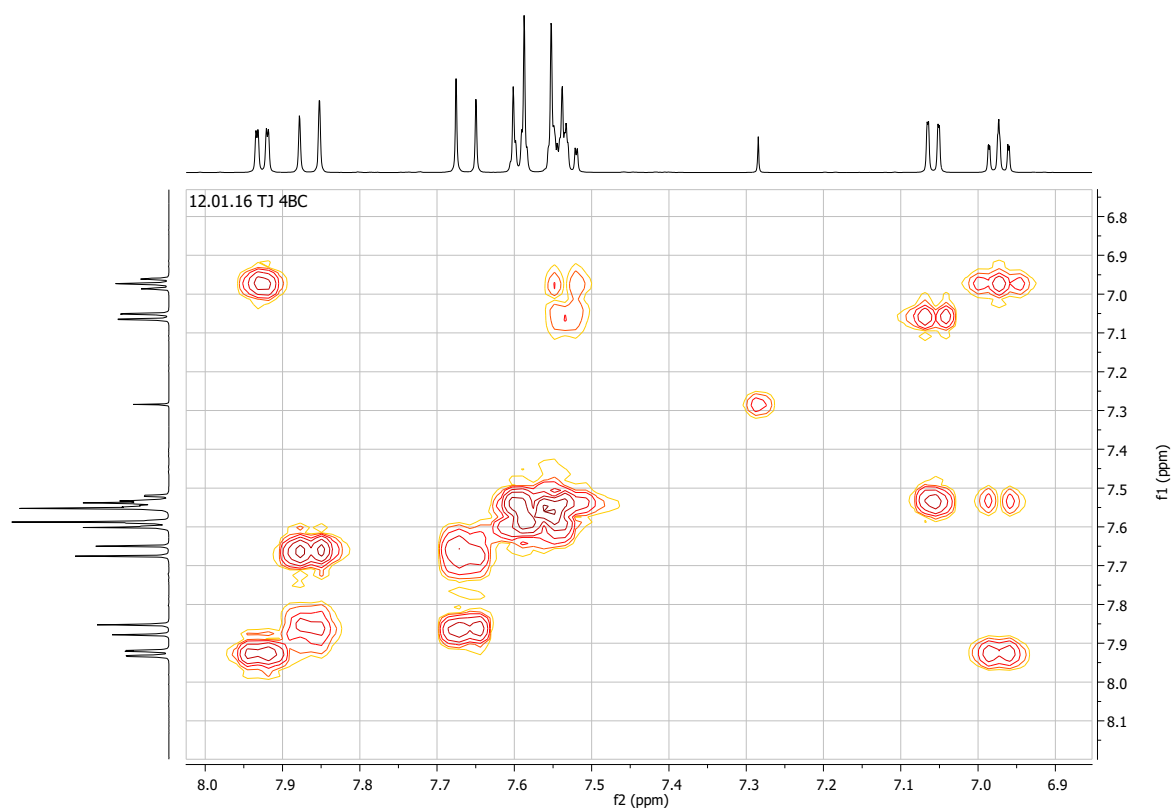

Figure S29. HSQC spectral of 1-(2'-hydroxyphenyl)-3-(4''-bromophenyl)-prop-2-en-1-one (**3**) (CDCl<sub>3</sub>, 151 MHz)

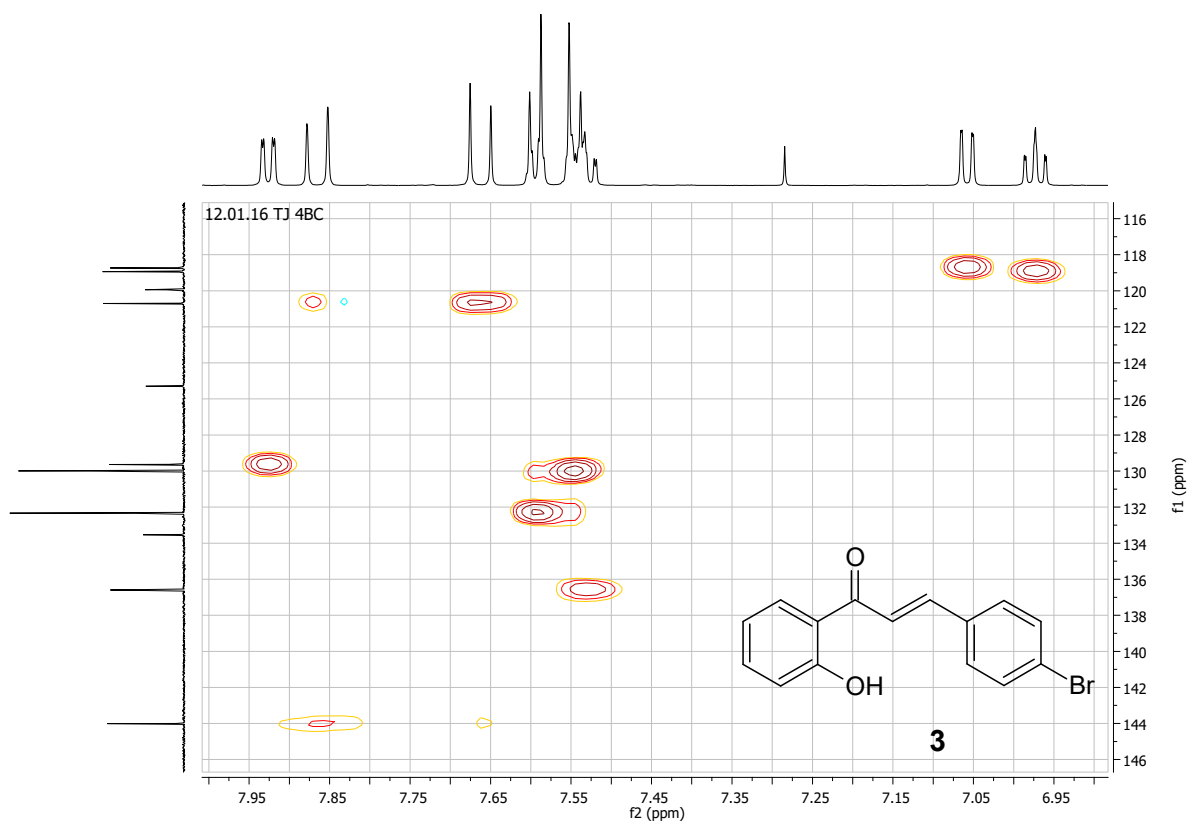

Figure S30.  $^1\text{H}$  NMR spectral of 1-(2'-hydroxyphenyl)-3-(4''-bromophenyl)-propan-1-one (**7**) ( $\text{CDCl}_3$ , 600 MHz)

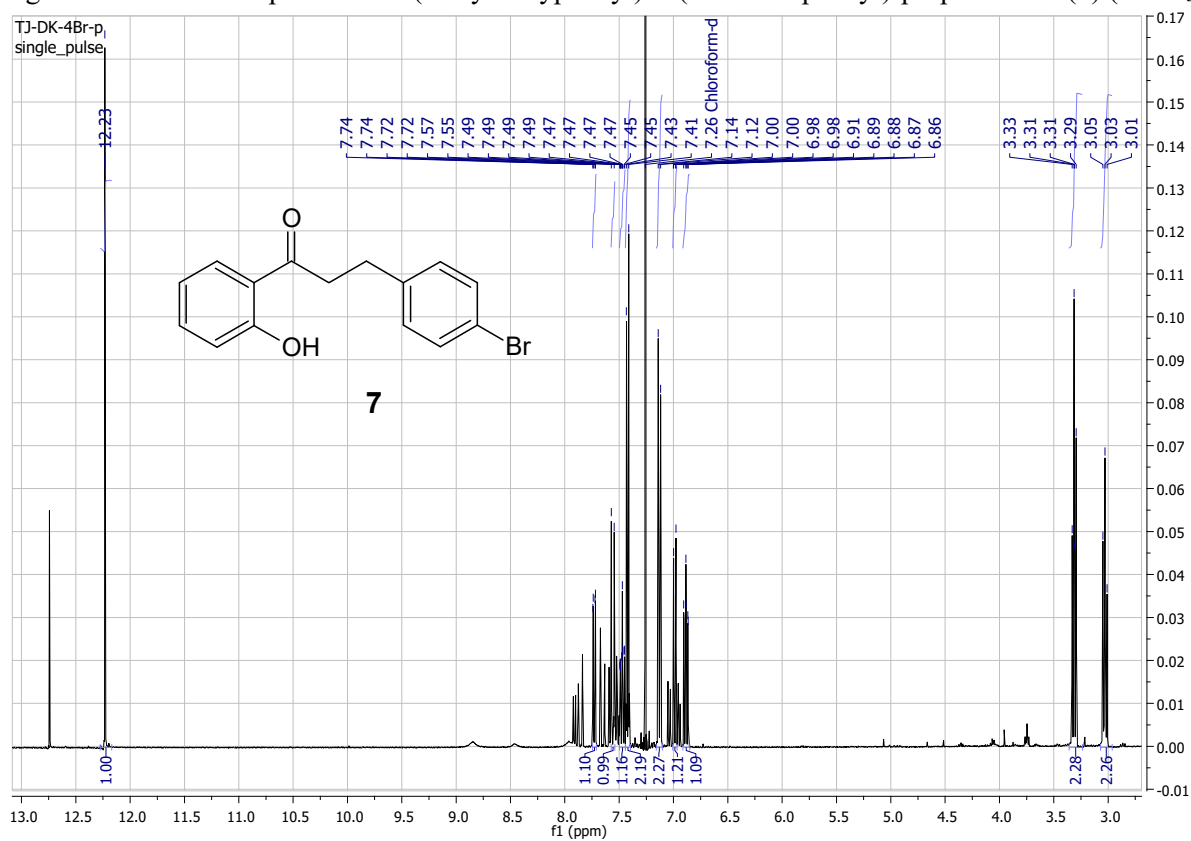

Figure S31. Part of the  $^{13}\text{C}$  NMR spectral of 1-(2'-hydroxyphenyl)-3-(4''-bromophenyl)-propan-1-one (**7**) ( $\text{CDCl}_3$ , 600 MHz)

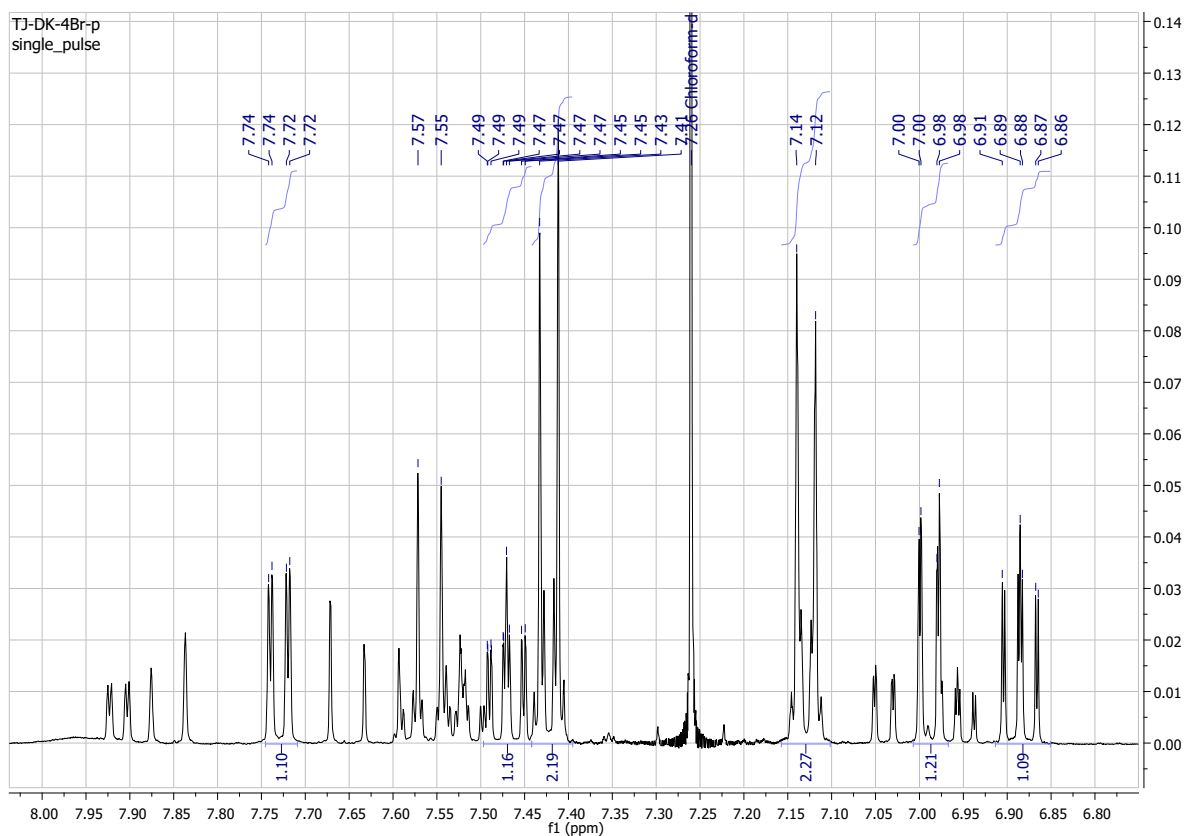

Figure S32.  $^{13}\text{C}$  NMR spectral of 1-(2'-hydroxyphenyl)-3-(4''-bromophenyl)propan-1-one (**7**) ( $\text{CDCl}_3$ , 151 MHz)

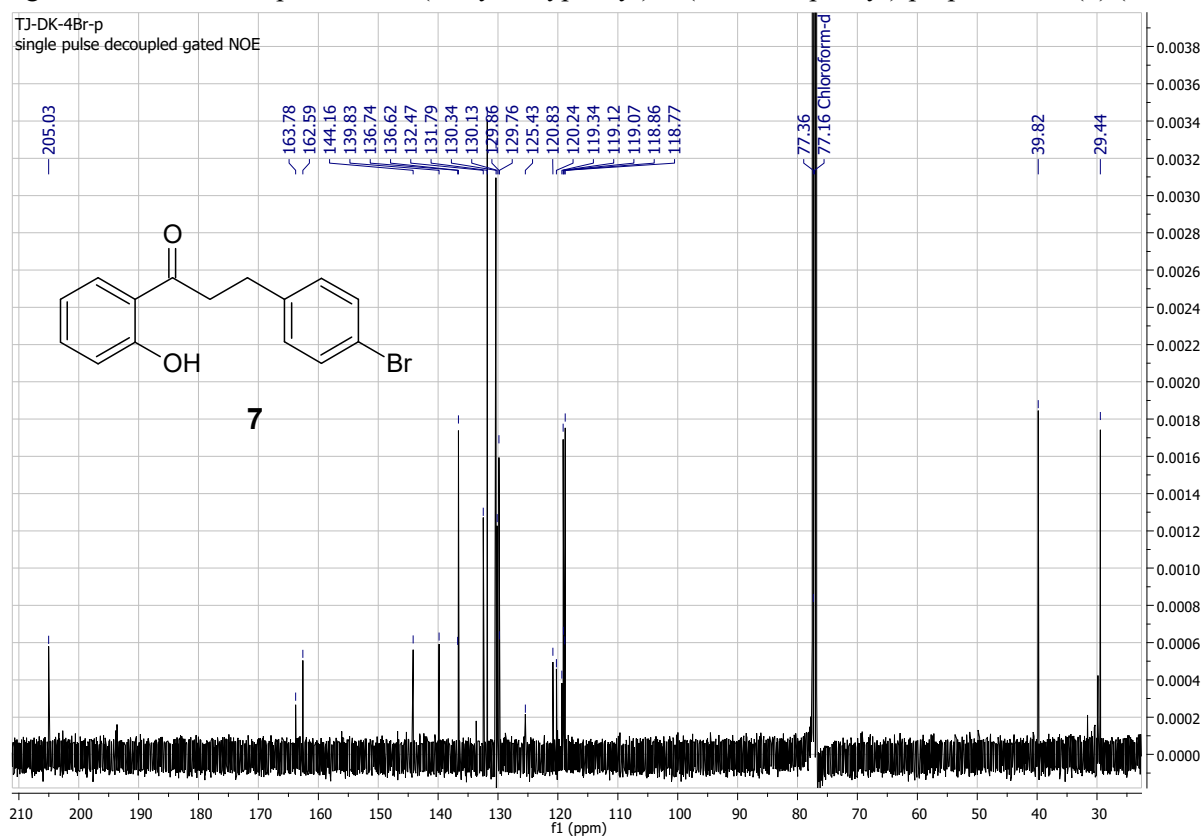

Figure S33. COSY spectral of 1-(2'-hydroxyphenyl)-3-(4''-bromophenyl)propan-1-one (**7**) ( $\text{CDCl}_3$ , 151 MHz)

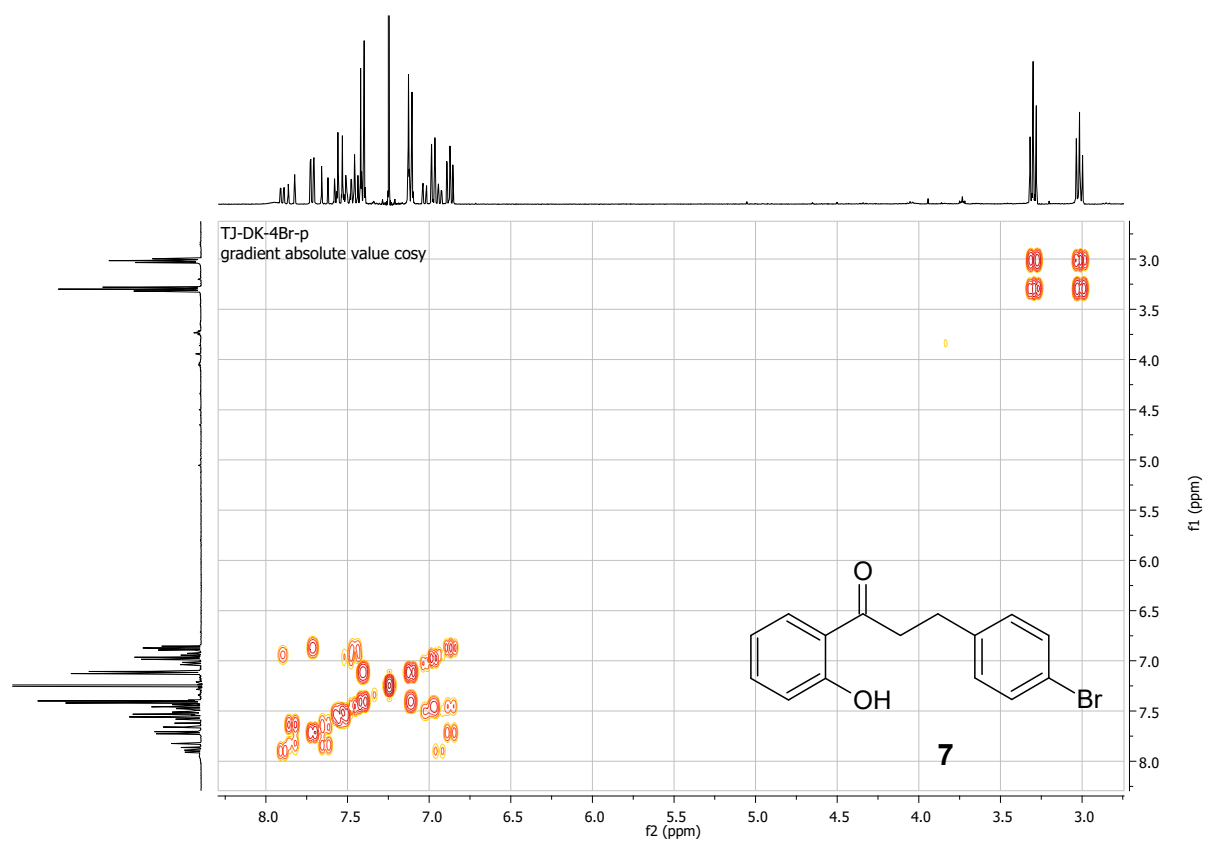

Figure S34. HSQC spectral of 1-(2'-hydroxyphenyl)-3-(4''-bromophenyl)-propan-1-one (**7**) (CDCl<sub>3</sub>, 151 MHz)

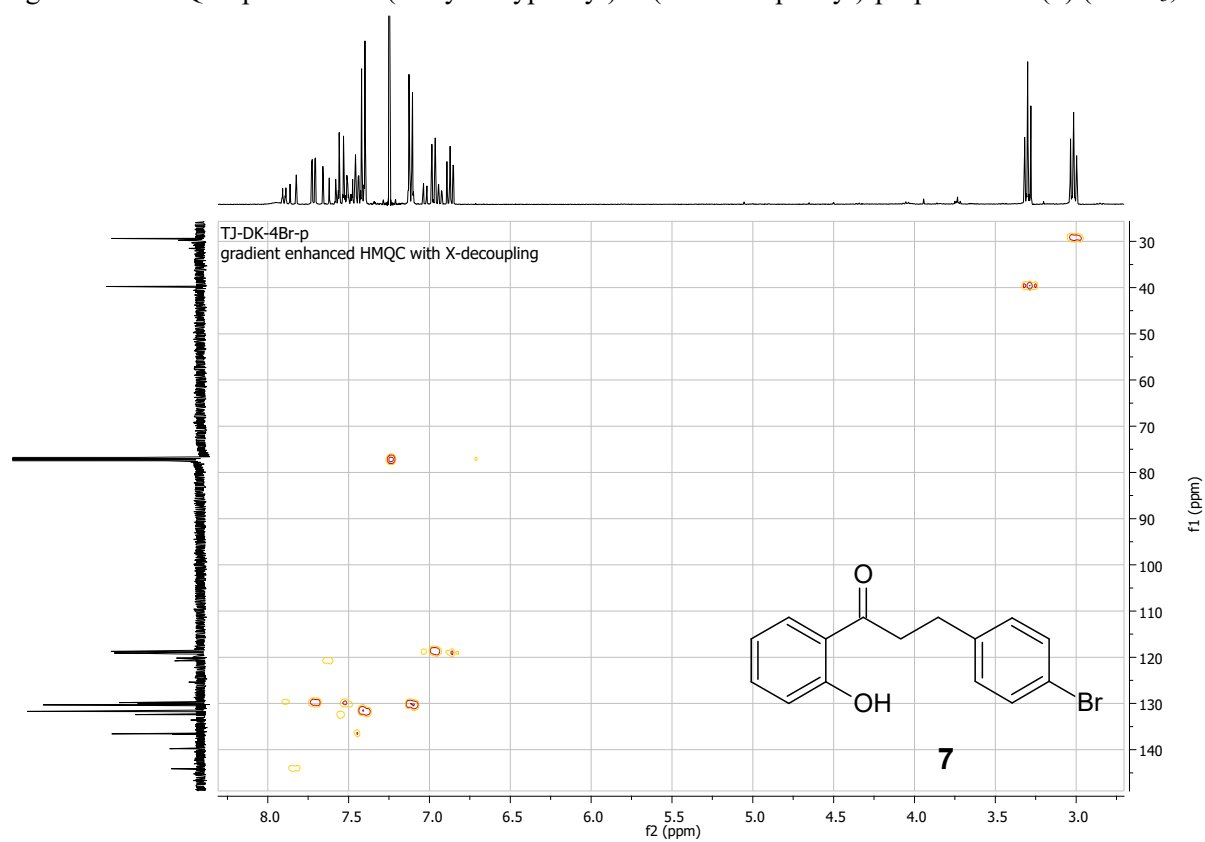

Figure S35. HMBC spectral of 1-(2'-hydroxyphenyl)-3-(4''-bromophenyl)-propan-1-one (**7**) (CDCl<sub>3</sub>, 151 MHz)

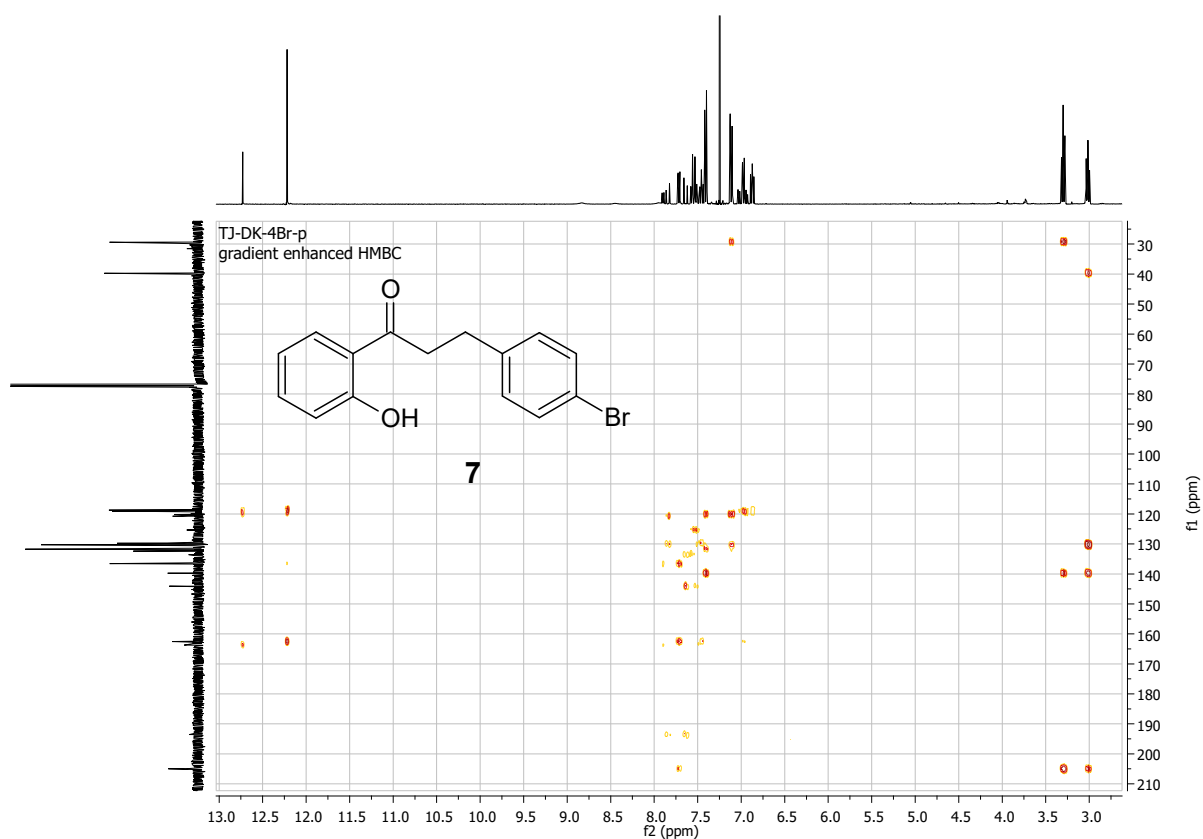

Figure S36.  $^1\text{H}$  NMR spectral of 1-(5'-bromo-2'-hydroxyphenyl)-3-phenyl-propan-1-one (**4**) ( $\text{CDCl}_3$ , 600 MHz)

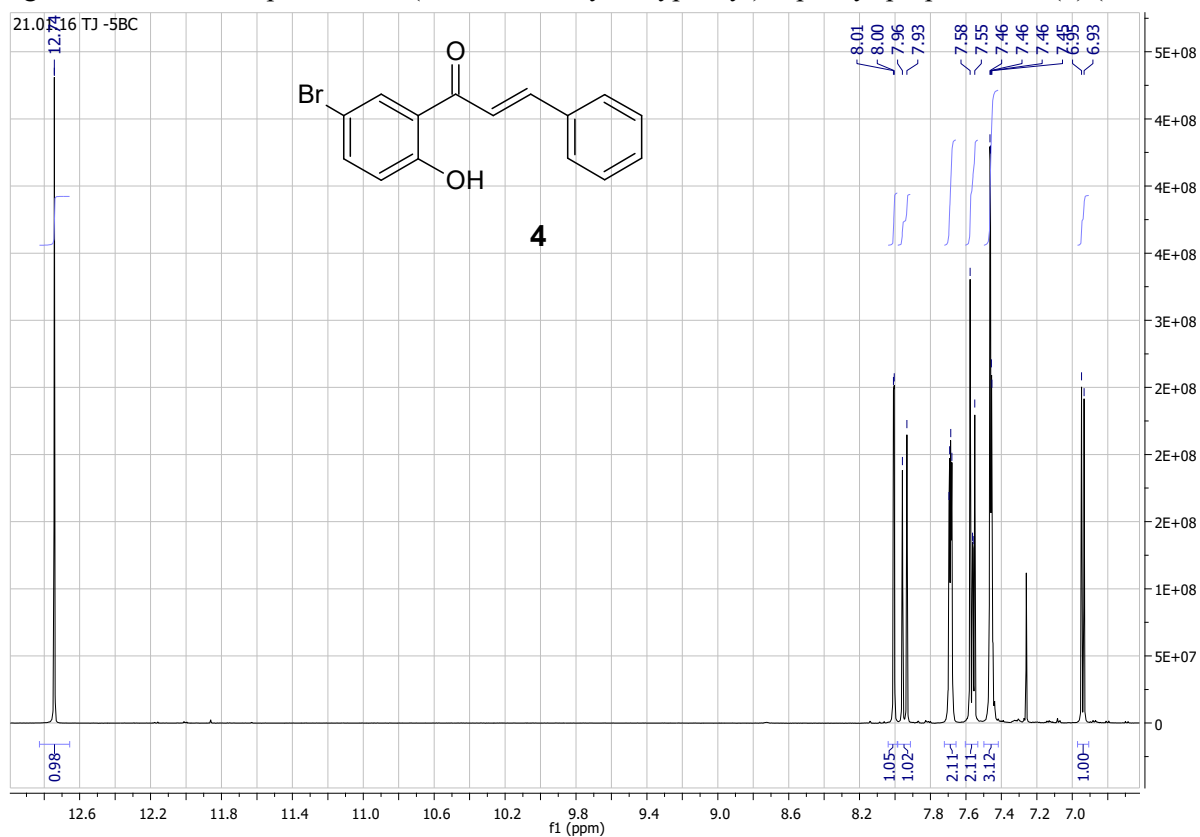

Figure S37. Part of the  $^1\text{H}$  NMR spectral of 1-(5'-bromo-2'-hydroxyphenyl)-3-phenyl-propan-1-one (**4**)

(CDCl<sub>3</sub>, 600 MHz)

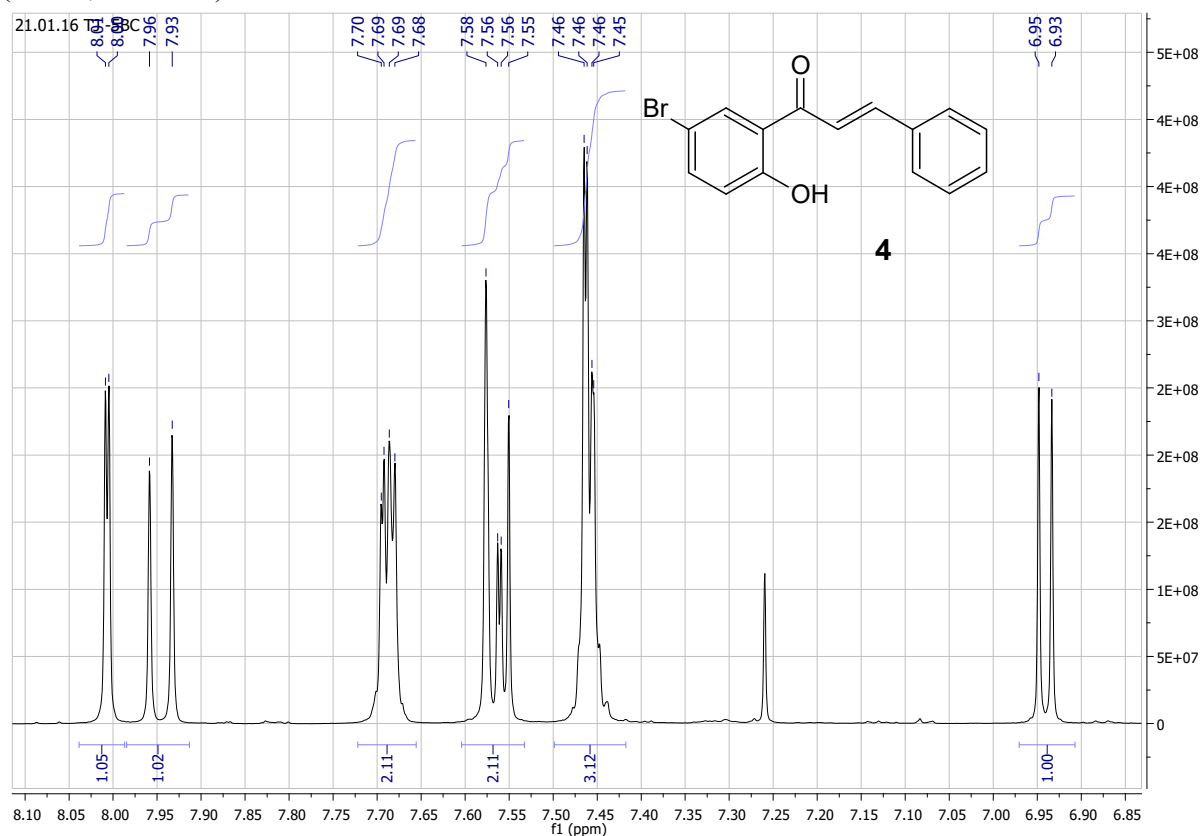

Figure S38. <sup>13</sup>C NMR spectral of 1-(5'-bromo-2'-hydroxyphenyl)-3-phenyl-propan-1-one (**4**) (CDCl<sub>3</sub>, 151 MHz)

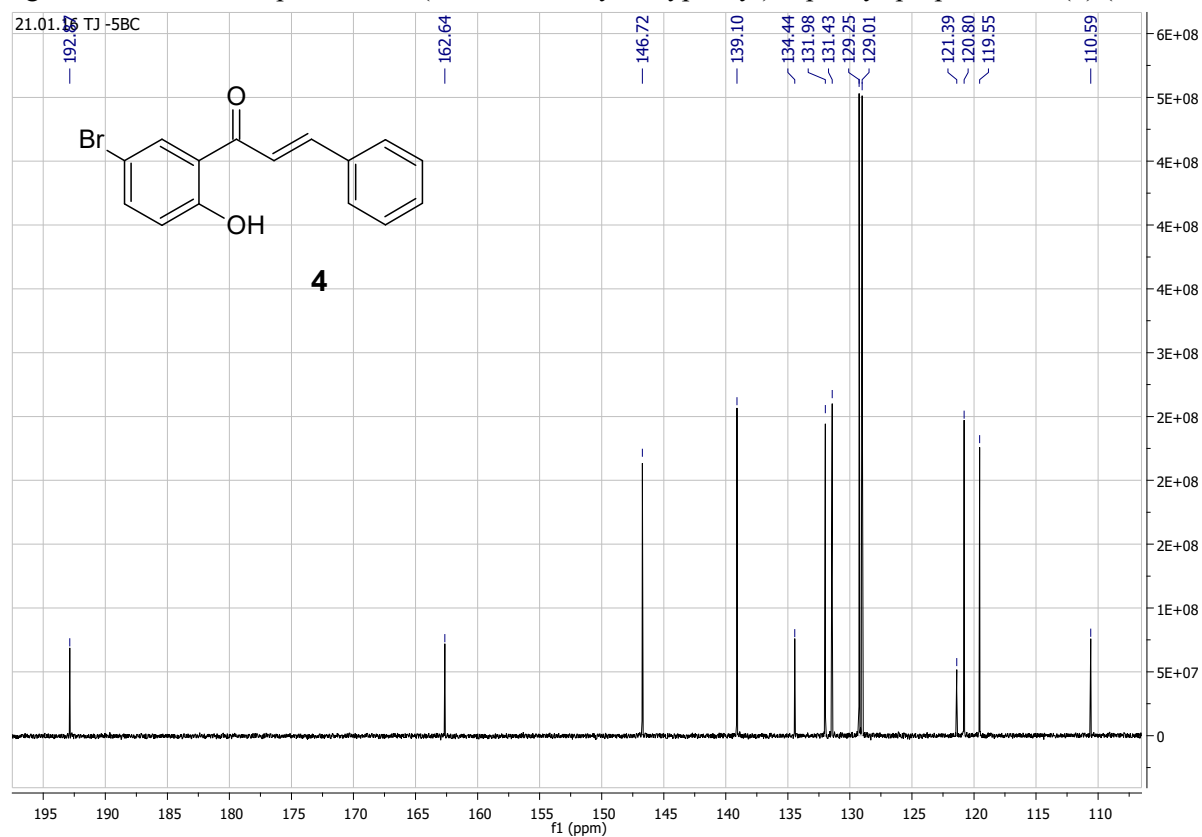

Figure S39. COSY spectral of 1-(5'-bromo-2'-hydroxyphenyl)-3-phenyl-propan-1-one (**4**) (CDCl<sub>3</sub>, 151 MHz)

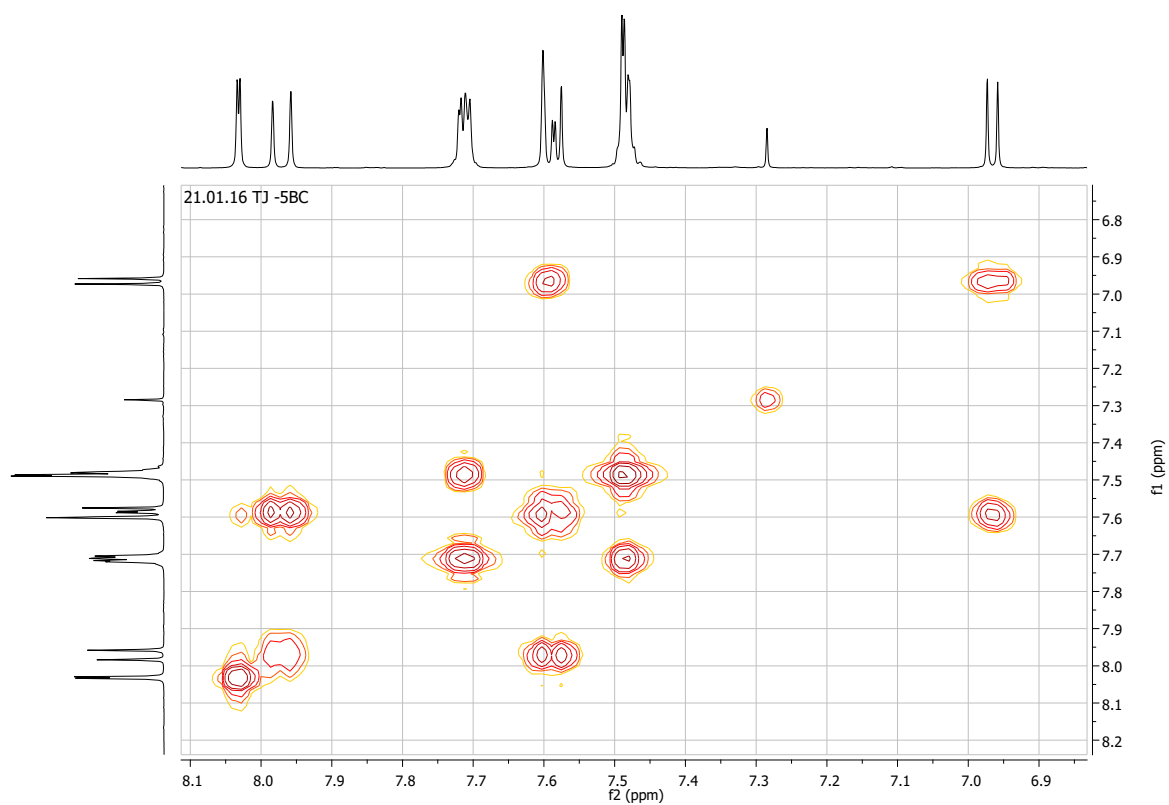

Figure S40. HSQC spectral of 1-(5'-bromo-2'-hydroxyphenyl)-3-phenyl-propan-1-one (**4**) (CDCl<sub>3</sub>, 151 MHz)

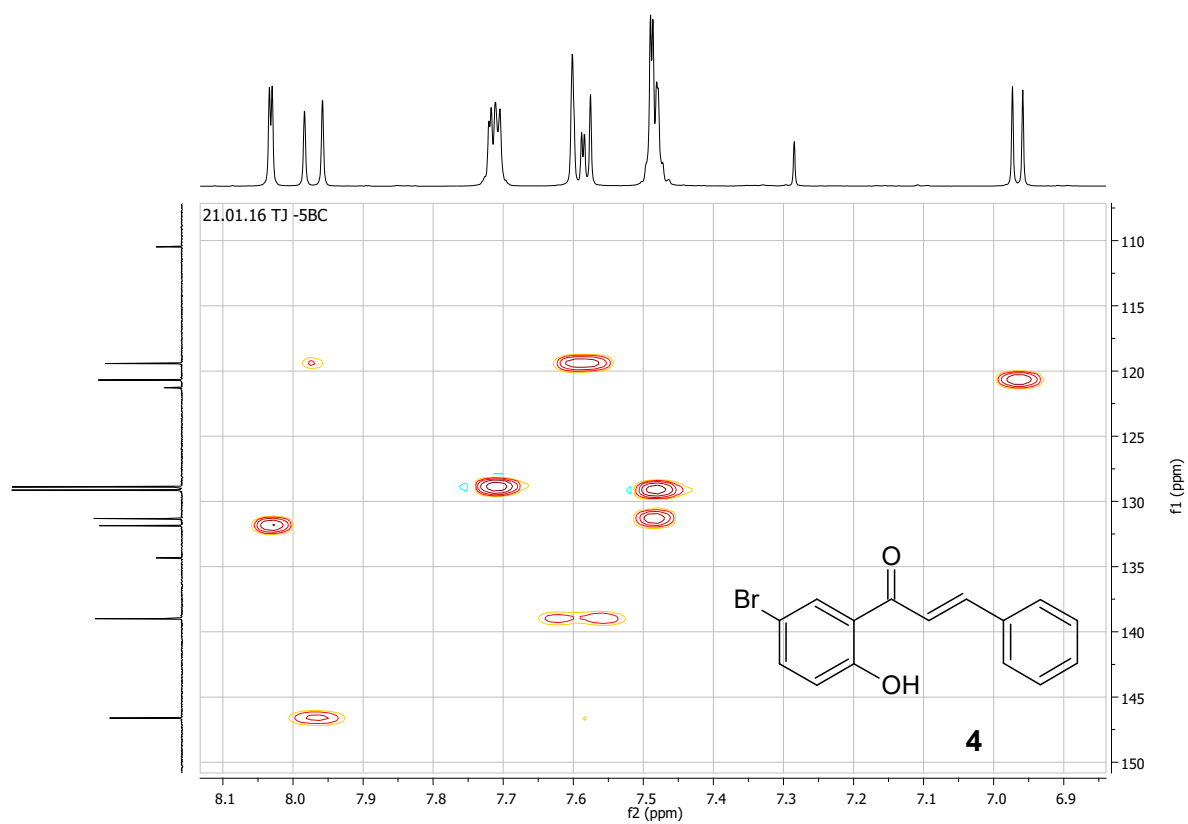

Figure S41. <sup>1</sup>H NMR spectral of 1-(5'-bromo-2'-hydroxyphenyl)-3-phenyl-prop-2-en-1-one (**8**) (CDCl<sub>3</sub>, 600 MHz)



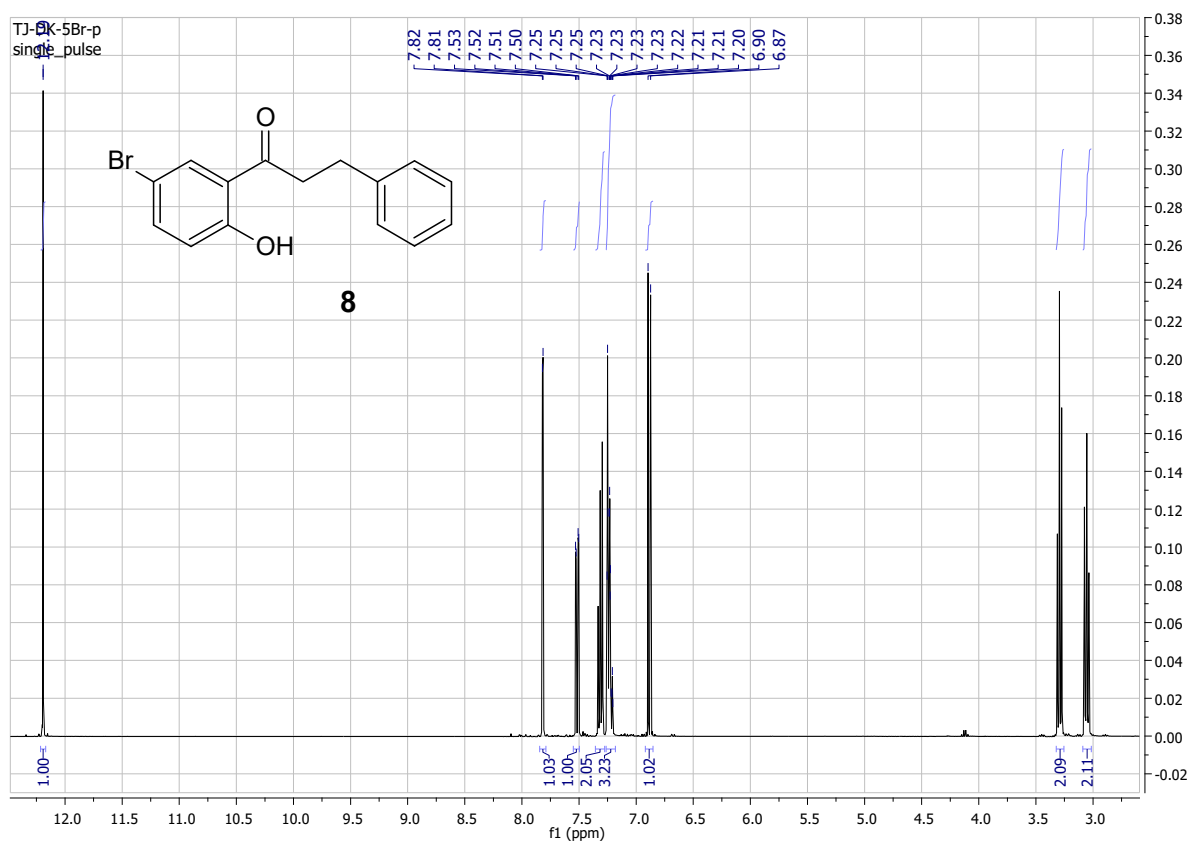

Figure S42. Part of the <sup>13</sup>C NMR spectral of 1-(5'-bromo-2'-hydroxyphenyl)-3-phenyl-prop-2-en-1-one (**8**) (CDCl<sub>3</sub>, 600 MHz)

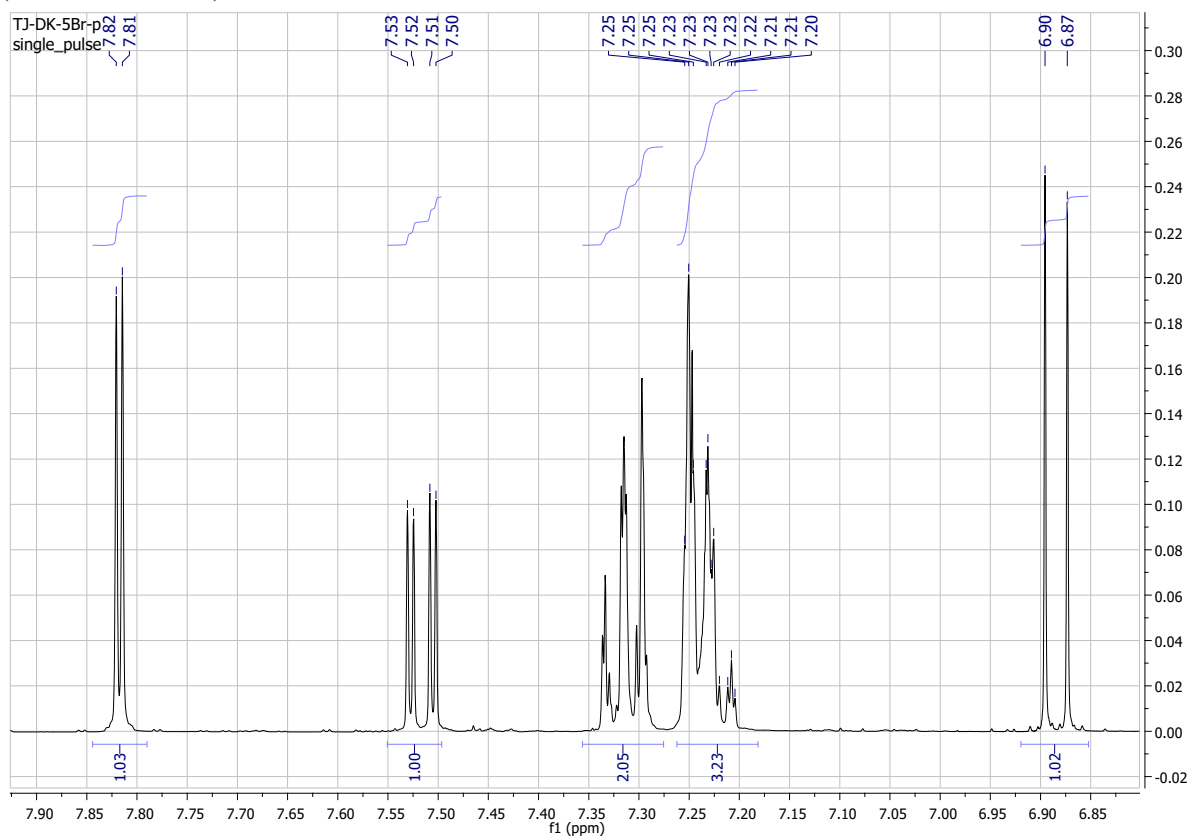

Figure S43.  $^{13}\text{C}$  NMR spectral of 1-(5'-bromo-2'-hydroxyphenyl)-3-phenyl-prop-2-en-1-one (**8**) ( $\text{CDCl}_3$ , 151 MHz)

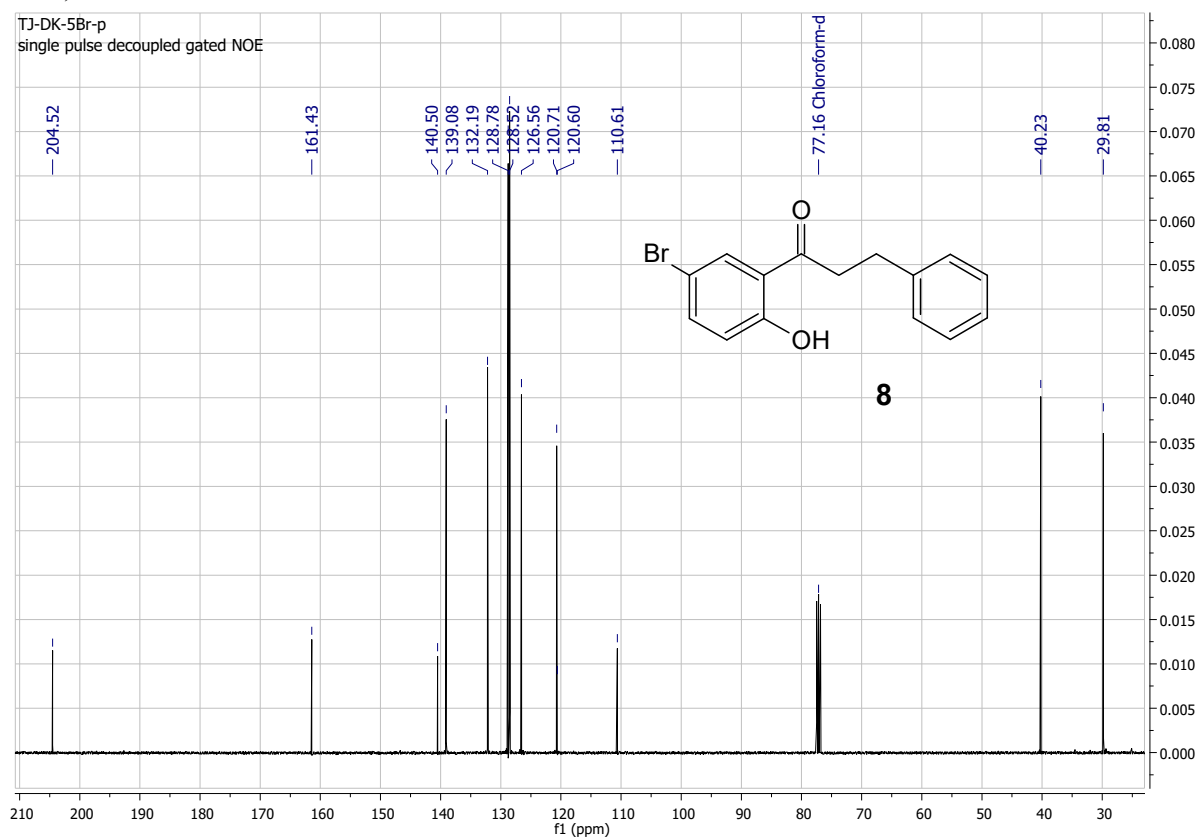

Figure S44. COSY spectral of 1-(5'-bromo-2'-hydroxyphenyl)-3-phenyl-prop-2-en-1-one (**8**) ( $\text{CDCl}_3$ , 151 MHz)

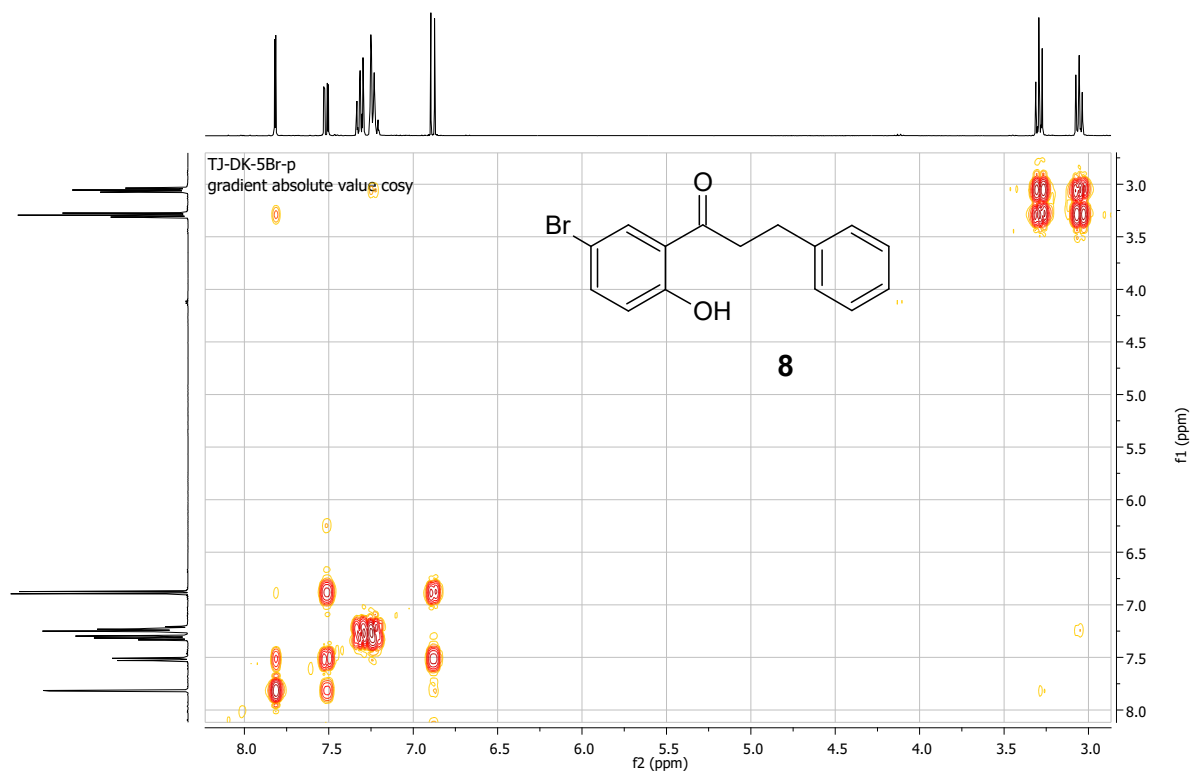

Figure S45. HSQC spectral of 1-(5'-bromo-2'-hydroxyphenyl)-3-phenyl-prop-2-en-1-one (**8**) (CDCl<sub>3</sub>, 151 MHz)

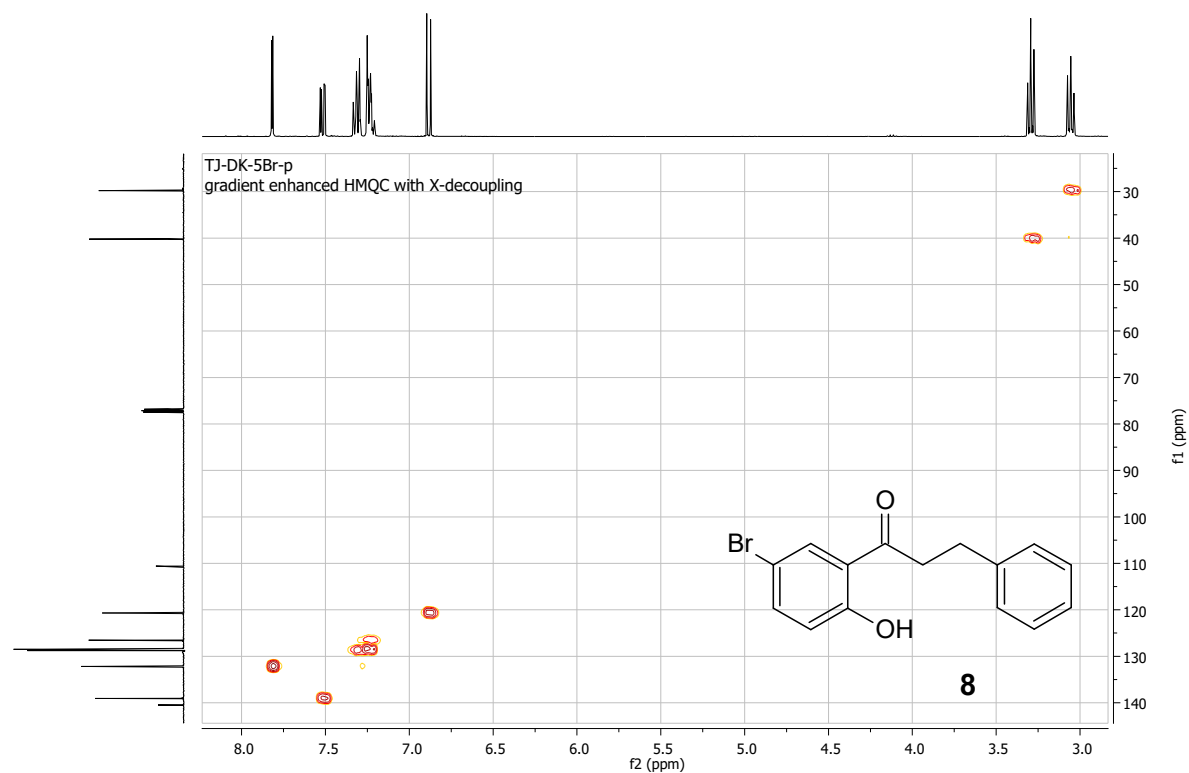

Figure S46. HMBC spectral of 1-(5'-bromo-2'-hydroxyphenyl)-3-phenyl-prop-2-en-1-one (**8**) (CDCl<sub>3</sub>, 151 MHz)

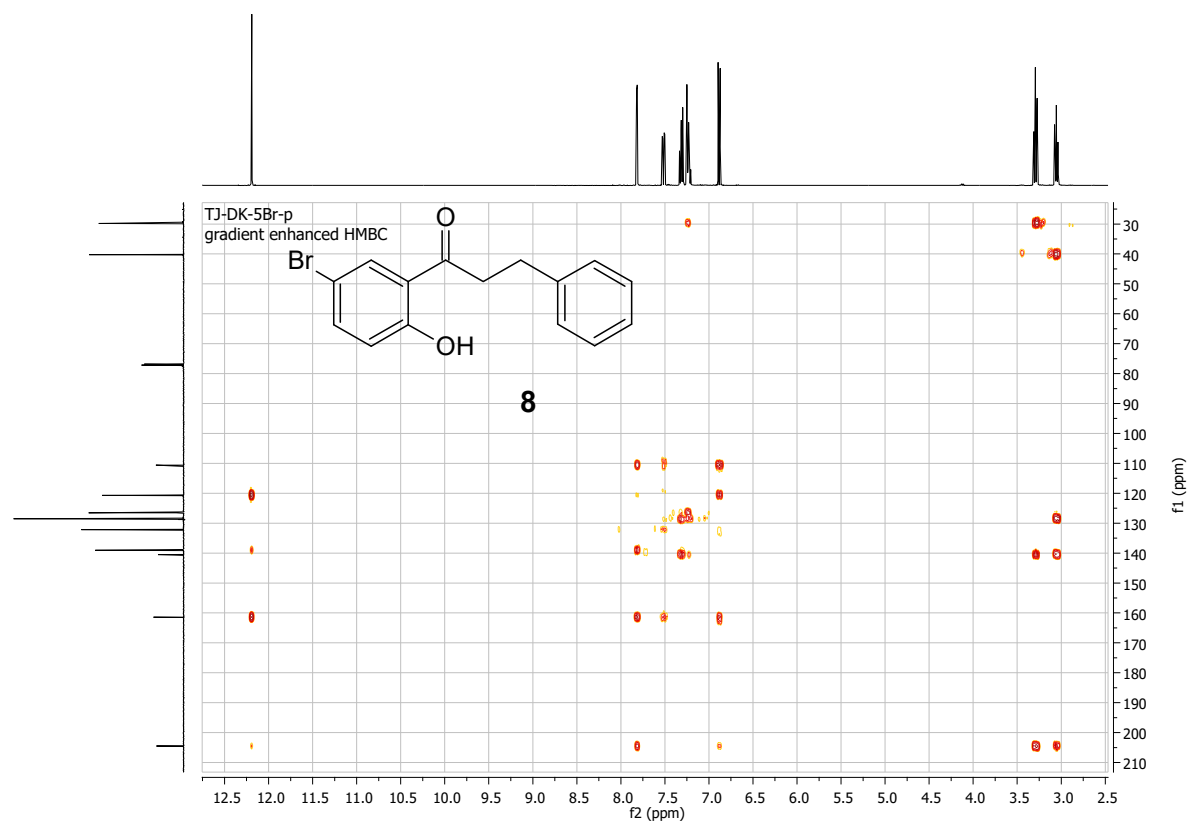

Figure S47. Preparative TLC plate showing the separation of the post-reaction mixture after biotransformation of 2'-hydroxy-2"-bromochalcone (**1**)

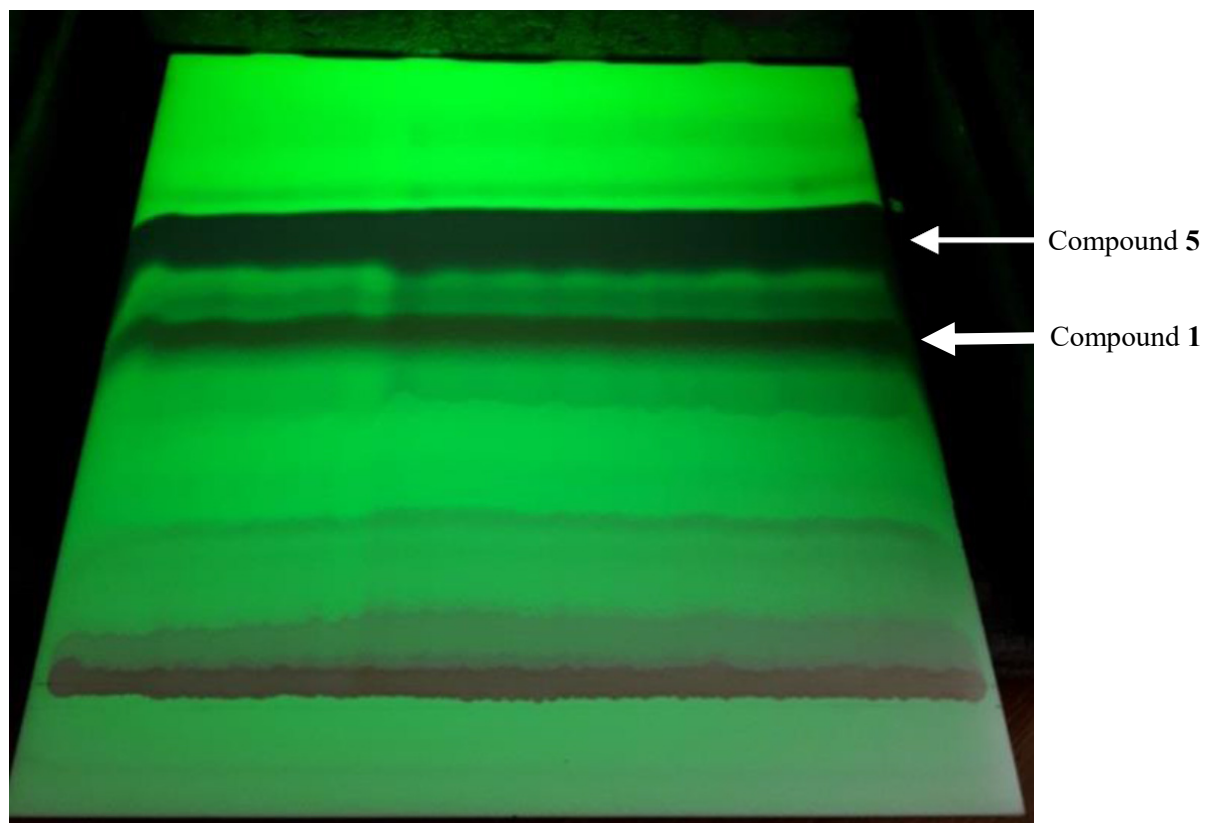

Figure S48. Preparative TLC plate showing the separation of the post-reaction mixture after biotransformation of 2'-hydroxy-3"-bromochalcone (**2**)

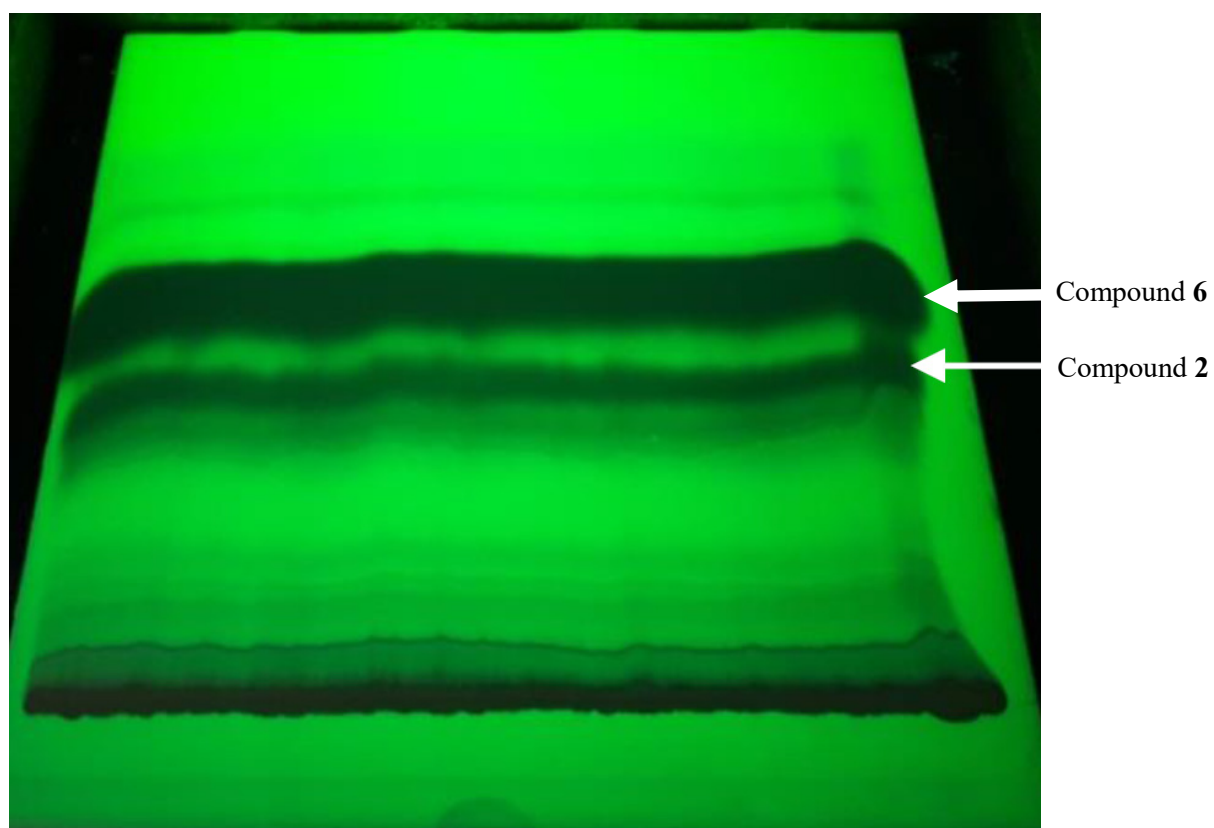

Figure S49. Preparative TLC plate showing the separation of the post-reaction mixture after biotransformation of 2'-hydroxy-4''-bromochalcone (**3**)

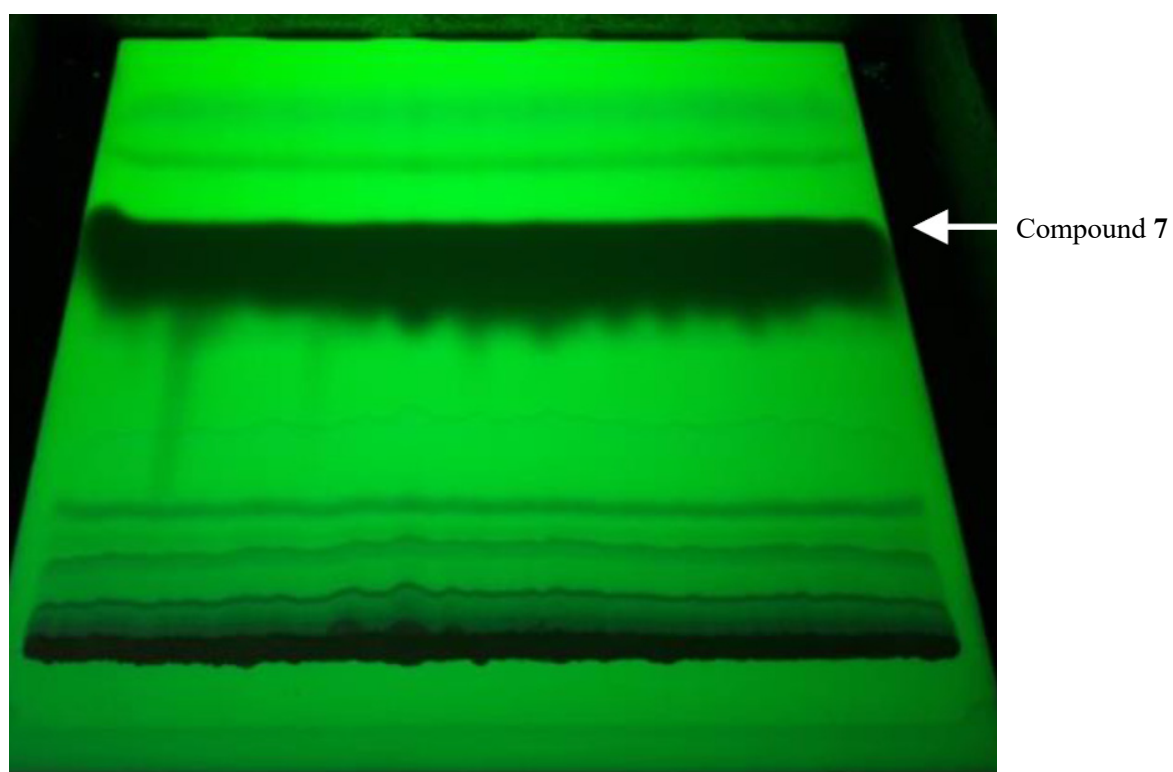

Figure S50. Preparative TLC plate showing the separation of the post-reaction mixture after biotransformation of 2'-hydroxy-5'-bromochalcone (**4**)

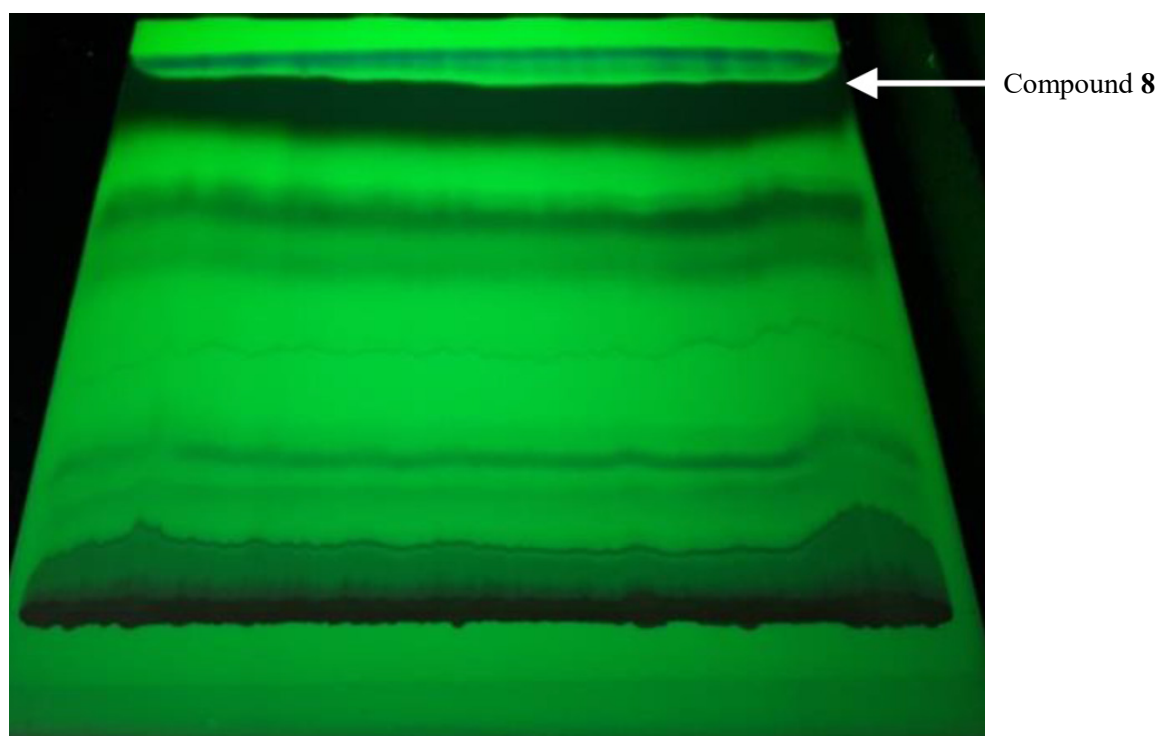

Figure S51. Selected chromatograms showing the composition of the reaction mixtures during the biotransformation of the tested compounds:

a) GC analysis obtained after 12 hours transformation of 2'-hydroxy-2"-bromochalcone (**1**)

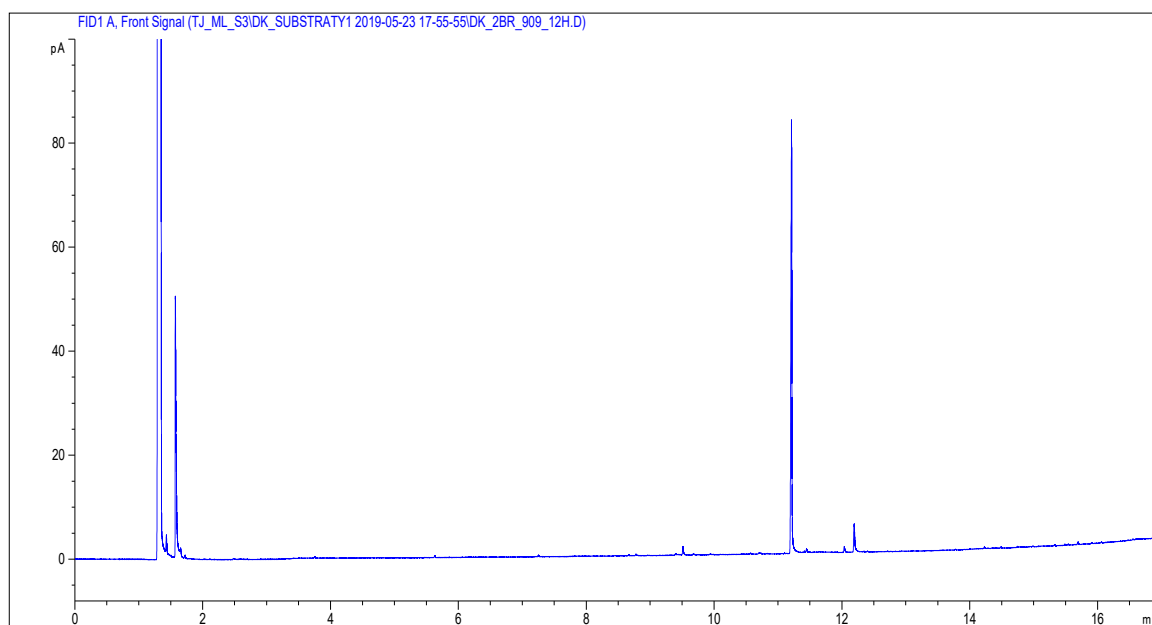

b) GC analysis obtained after 3 days transformation of 2'-hydroxy-2"-bromochalcone (**2**)

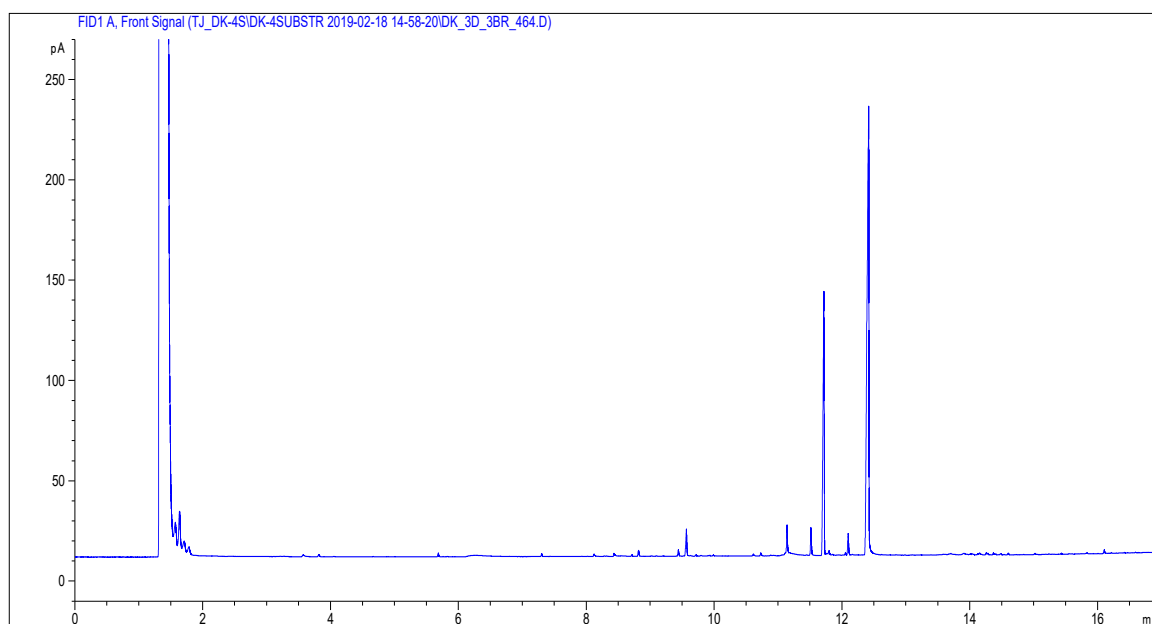

c) GC analysis obtained after 3 hours transformation of 2'-hydroxy-5'-bromochalcone (**4**)

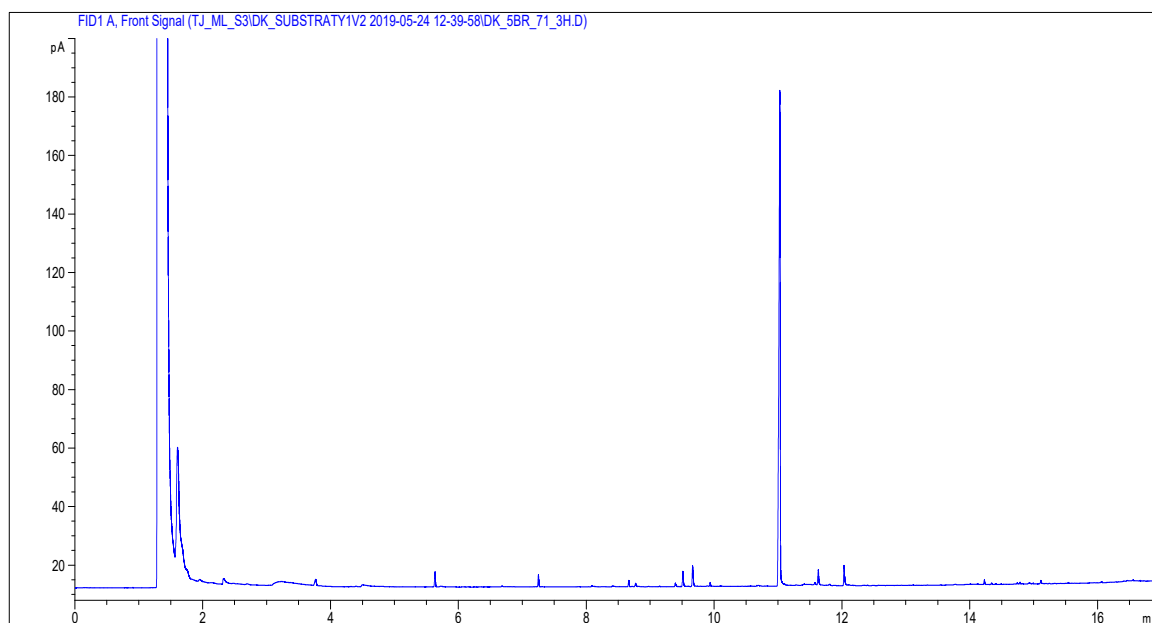

d) GC analysis obtained after 10 days transformation of 2'-hydroxy-5'-bromochalcone (**4**)

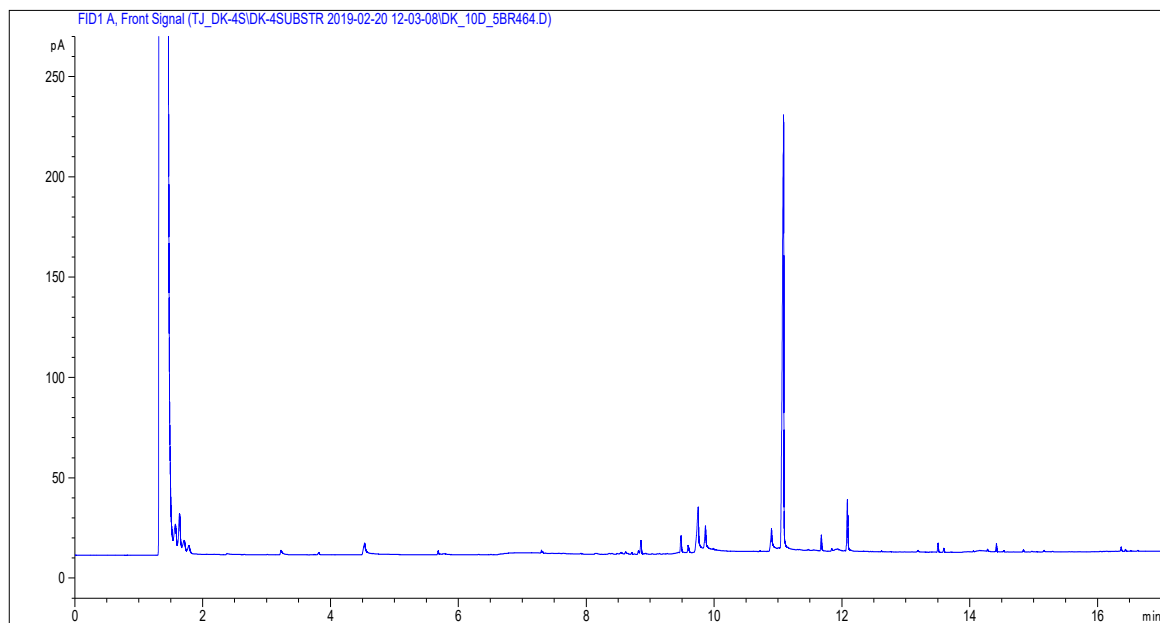

Supplement: s1 [file s1]
